# Supplementary material for: Mechanism and kinetics for the reactions of methacrolein and methyl vinyl ketone with HO2radical
Source: Royal Society of Chemistry journal article supplement (doi:10.1039/c7nj01260h), 2017-01-01
Supplement: c7nj01260h1.pdf [file c7nj01260h1.pdf]

## Supplementary Information for: Mechanism and Kinetics for the Reaction of Methacrolein and Methyl Vinyl Ketone with HO<sub>2</sub> Radical

Cuihong Sun<sup>a, b</sup>, Yanli Zeng<sup>b</sup>, Baoen Xu<sup>a</sup>, and Lingpeng Meng<sup>b, \*</sup>

<sup>a</sup> College of Chemical Engineering, Shijiazhuang University, Shijiazhuang, 050035, People's Republic of China

<sup>b</sup> College of Chemistry and Material Science, Hebei Normal University, Road East of 2nd Ring South, Shijiazhuang, 050024, People's Republic of China

\* E-mail: [menglp@mail.hebtu.edu.cn](mailto:menglp@mail.hebtu.edu.cn); Tel.: +86 311 80787427

To be published in **New Journal of Chemistry**.

### **Table of contents**

p.S2 The cartesian coordinates and vibrational frequencies of all stationary points at the M06-2X/6-311+G(2df,2pd) level of theory;

p.S37 Table S1. Topological and Energy Parameters at the Bond Critical Points of the Reactant Complexes in MACR + HO<sub>2</sub> Reaction (All Values in a.u.)

p.S38 Figure S1. Molecular graphs of the MACR + HO<sub>2</sub> → TSHaddO → PHaddO reaction process;

p.S39 Figure S2. Molecular graphs of the MACR + HO<sub>2</sub> → TSabsH-CHO → PabsH-CHO reaction process;

p.S40 Table S2. Topological and Energy Parameters at the Bond Critical Points in the MACR + HO<sub>2</sub> → TSHaddO → PHaddO Reaction Process (All Values in a.u.);

p.S41 Table S3a. Topological Parameters at the Bond Critical Points in the MACR + HO<sub>2</sub> → TSabsH-CHO → PabsH-CHO Reaction Process (All Values in a.u.);

p.S42 Table S3b. Energy Parameters at the Bond Critical Points in the MACR + HO<sub>2</sub> → TSabsH-CHO → PabsH-CHO Reaction Process (All Values in a.u.);

p.S43 Table S4. Topological and Energy Parameters at the Bond Critical Points of the Reactant Complexes in MVK + HO<sub>2</sub> Reaction (All Values in a.u.)

p.S43 Table S5. The rate constants of the addition and hydrogen abstraction reaction channels for the reaction of MACR + HO<sub>2</sub> in the temperature range of 200-500 K; Table S6. The rate constants of the addition reaction channel for the reaction of MVK + HO<sub>2</sub> in the temperature range of 200-500 K.

The cartesian coordinates and vibrational frequencies of all stationary points at the M06-2X/6-311+G(2df,2pd) level of theory.

**MACR+HO<sub>2</sub> reaction:**

**MACR**

COORDINATES

|   |           |           |           |
|---|-----------|-----------|-----------|
| C | 1.500621  | -0.935076 | 0.000016  |
| H | 1.319445  | -2.003023 | 0.000021  |
| H | 2.531669  | -0.606939 | 0.000023  |
| C | 0.486646  | -0.074676 | -0.000002 |
| C | -0.886078 | -0.634237 | -0.000013 |
| O | -1.880308 | 0.041518  | -0.000003 |
| H | -0.945374 | -1.738851 | 0.000011  |
| C | 0.609642  | 1.414933  | -0.000005 |
| H | 1.652435  | 1.723307  | -0.000056 |
| H | 0.109601  | 1.833856  | -0.873203 |
| H | 0.109696  | 1.833850  | 0.873251  |

FREQUENCY

|           |           |           |
|-----------|-----------|-----------|
| 153.6267  | 187.0489  | 265.2063  |
| 402.8482  | 433.0467  | 631.8875  |
| 721.7360  | 845.6866  | 980.6968  |
| 997.2578  | 1023.8917 | 1038.5843 |
| 1081.1386 | 1342.2593 | 1397.8716 |
| 1419.0286 | 1456.7995 | 1477.0457 |
| 1492.2582 | 1728.1922 | 1838.0984 |
| 2980.2398 | 3057.0095 | 3116.8882 |
| 3148.1554 | 3151.2651 | 3237.5085 |

**OH**

COORDINATES

|   |           |           |          |
|---|-----------|-----------|----------|
| O | 0.054961  | 0.706958  | 0.000000 |
| O | 0.054961  | -0.598630 | 0.000000 |
| H | -0.879377 | -0.866625 | 0.000000 |

FREQUENCY

|           |           |           |
|-----------|-----------|-----------|
| 1268.3079 | 1469.5614 | 3711.5004 |
|-----------|-----------|-----------|

**Com1**

COORDINATES

|   |           |           |           |
|---|-----------|-----------|-----------|
| C | 2.800702  | -0.388213 | -0.180988 |
| H | 3.439708  | 0.457714  | -0.402830 |
| H | 3.268120  | -1.362460 | -0.129130 |
| C | 1.494016  | -0.224296 | 0.015912  |
| C | 0.981741  | 1.154231  | -0.076647 |
| O | -0.176164 | 1.464186  | 0.082910  |
| H | 1.730356  | 1.931269  | -0.302576 |

|   |           |           |           |
|---|-----------|-----------|-----------|
| C | 0.513745  | -1.310428 | 0.319905  |
| H | 1.010434  | -2.275174 | 0.385694  |
| H | 0.003720  | -1.111200 | 1.263661  |
| H | -0.258836 | -1.355142 | -0.449022 |
| O | -2.574598 | -0.642570 | -0.636047 |
| O | -2.532034 | 0.141640  | 0.406386  |
| H | -1.672364 | 0.621181  | 0.339121  |

FREQUENCY

|           |           |           |
|-----------|-----------|-----------|
| 30.2189   | 52.7139   | 92.2924   |
| 121.3188  | 185.6619  | 217.9958  |
| 224.0292  | 294.9315  | 413.5541  |
| 441.4030  | 618.9168  | 653.4060  |
| 715.0297  | 849.9127  | 981.5697  |
| 1006.5506 | 1030.6322 | 1043.7977 |
| 1088.1929 | 1296.2224 | 1349.3138 |
| 1406.8295 | 1429.4690 | 1465.8585 |
| 1480.6839 | 1502.2214 | 1579.8475 |
| 1725.4265 | 1806.7434 | 3039.1087 |
| 3051.9878 | 3113.3776 | 3146.4068 |
| 3148.6460 | 3234.7747 | 3404.9299 |

**Com2**

COORDINATES

|   |           |           |           |
|---|-----------|-----------|-----------|
| C | -2.310146 | -0.199816 | -0.808808 |
| H | -2.528898 | 0.575215  | -1.532973 |
| H | -2.956523 | -1.067180 | -0.800276 |
| C | -1.279760 | -0.080858 | 0.025230  |
| C | -0.485548 | 1.156470  | -0.077924 |
| O | 0.454185  | 1.424292  | 0.637276  |
| H | -0.814677 | 1.870928  | -0.850875 |
| C | -0.876661 | -1.084481 | 1.057091  |
| H | 0.090278  | -1.518917 | 0.802208  |
| H | -0.770149 | -0.606158 | 2.030668  |
| H | -1.610030 | -1.883954 | 1.129384  |
| O | 1.694407  | -0.673991 | -0.985949 |
| O | 2.406992  | -0.310696 | 0.041630  |
| H | 1.858021  | 0.365339  | 0.504679  |

FREQUENCY

|           |           |           |
|-----------|-----------|-----------|
| 37.6195   | 67.0408   | 101.1363  |
| 119.0783  | 155.5211  | 217.9988  |
| 223.9584  | 280.5408  | 415.9417  |
| 432.2917  | 541.2876  | 637.5329  |
| 713.8479  | 850.5827  | 994.8978  |
| 1000.7560 | 1029.8447 | 1046.7958 |
| 1082.7146 | 1293.8279 | 1349.4516 |

|           |           |           |
|-----------|-----------|-----------|
| 1405.7191 | 1425.0289 | 1466.3030 |
| 1480.4501 | 1501.3616 | 1531.2208 |
| 1726.0976 | 1799.3835 | 3034.0321 |
| 3062.6538 | 3128.0831 | 3150.1315 |
| 3150.5198 | 3243.7584 | 3407.4021 |

### Com3

#### COORDINATES

|   |           |           |           |
|---|-----------|-----------|-----------|
| C | 0.181429  | 1.566863  | -0.962352 |
| H | 0.075095  | 1.342856  | -2.017699 |
| H | -0.088428 | 2.563633  | -0.636003 |
| C | 0.669785  | 0.656861  | -0.119320 |
| C | 1.075548  | -0.665460 | -0.675743 |
| O | 1.682914  | -1.482340 | -0.042667 |
| H | 0.797596  | -0.839409 | -1.731686 |
| C | 0.875852  | 0.851288  | 1.346335  |
| H | 0.576394  | 1.847297  | 1.663977  |
| H | 0.306176  | 0.102667  | 1.898894  |
| H | 1.923959  | 0.688186  | 1.596680  |
| O | -1.655798 | -1.102461 | 0.213128  |
| O | -2.362492 | -0.018228 | 0.070276  |
| H | -1.723460 | 0.661686  | -0.233583 |

#### FREQUENCY

|           |           |           |
|-----------|-----------|-----------|
| 53.6980   | 81.1316   | 90.3079   |
| 123.1960  | 139.9135  | 186.9356  |
| 215.8936  | 268.5340  | 398.4935  |
| 431.1514  | 457.1746  | 626.0706  |
| 738.2860  | 841.4138  | 976.7063  |
| 985.3376  | 1020.5647 | 1038.3823 |
| 1082.8262 | 1284.4061 | 1338.1436 |
| 1396.5338 | 1418.3816 | 1454.8652 |
| 1470.0451 | 1491.9075 | 1496.4894 |
| 1721.4374 | 1851.8082 | 2998.7094 |
| 3056.8329 | 3120.5020 | 3134.2241 |
| 3150.4833 | 3224.2293 | 3527.7445 |

### Com4

#### COORDINATES

|   |           |           |           |
|---|-----------|-----------|-----------|
| C | 0.183460  | 0.242320  | 1.415911  |
| H | 0.219051  | -0.640406 | 2.043647  |
| H | 0.906826  | 1.019969  | 1.620891  |
| C | -0.714777 | 0.344513  | 0.435554  |
| C | -1.662422 | -0.784845 | 0.246686  |
| O | -2.506522 | -0.800998 | -0.607001 |
| H | -1.541678 | -1.626586 | 0.953817  |
| C | -0.864225 | 1.513734  | -0.487393 |
| H | -0.101951 | 2.266144  | -0.298715 |

|   |           |           |           |
|---|-----------|-----------|-----------|
| H | -0.806094 | 1.190049  | -1.527453 |
| H | -1.850678 | 1.961001  | -0.363486 |
| O | 2.889744  | -0.244443 | 0.117586  |
| O | 2.153334  | -0.419653 | -0.943601 |
| H | 1.229865  | -0.343750 | -0.629132 |

FREQUENCY

|           |           |           |
|-----------|-----------|-----------|
| 31.7410   | 47.0823   | 91.4780   |
| 121.7003  | 171.2361  | 193.0059  |
| 205.7588  | 259.4457  | 404.5844  |
| 417.9346  | 443.5385  | 628.7568  |
| 720.0770  | 838.9005  | 981.8941  |
| 1010.8322 | 1027.3664 | 1037.0797 |
| 1087.3416 | 1282.0794 | 1338.7421 |
| 1397.6963 | 1422.3113 | 1460.8762 |
| 1476.7193 | 1491.5027 | 1501.0599 |
| 1720.7789 | 1838.7010 | 2984.2735 |
| 3062.7674 | 3124.8054 | 3154.0671 |
| 3156.5455 | 3243.4421 | 3575.1665 |

**TS-HaddO**

COORDINATES

|   |           |           |           |
|---|-----------|-----------|-----------|
| C | 2.108042  | -0.975896 | -0.083848 |
| H | 1.957414  | -1.973139 | 0.310083  |
| H | 3.052272  | -0.772429 | -0.570617 |
| C | 1.169519  | -0.043282 | 0.034965  |
| C | -0.088390 | -0.402531 | 0.725146  |
| O | -0.818011 | 0.487560  | 1.260892  |
| H | -0.157596 | -1.435990 | 1.079825  |
| C | 1.276948  | 1.361090  | -0.468110 |
| H | 0.472977  | 1.569883  | -1.176482 |
| H | 1.167501  | 2.067765  | 0.353878  |
| H | 2.231759  | 1.525979  | -0.961003 |
| O | -1.224677 | -0.712006 | -0.807796 |
| O | -2.178078 | 0.083467  | -0.548140 |
| H | -1.754916 | 0.509468  | 0.475737  |

FREQUENCY

|           |           |           |
|-----------|-----------|-----------|
| -780.9345 | 75.7736   | 112.1744  |
| 175.4842  | 206.2881  | 283.8949  |
| 389.4293  | 457.1143  | 572.0935  |
| 623.1460  | 692.6518  | 740.8328  |
| 758.2350  | 854.8533  | 985.0852  |
| 989.9623  | 1045.1306 | 1056.5361 |
| 1069.8109 | 1121.1089 | 1341.3108 |
| 1366.5069 | 1396.1666 | 1418.5868 |
| 1454.8995 | 1481.7957 | 1492.5192 |

|           |           |           |
|-----------|-----------|-----------|
| 1637.0691 | 1744.8069 | 1919.5853 |
| 3054.8140 | 3092.9581 | 3115.4555 |
| 3155.0820 | 3156.0837 | 3242.0962 |

**TS-HaddC1**

COORDINATES

|   |           |           |           |
|---|-----------|-----------|-----------|
| C | 0.675069  | 0.965644  | 1.157156  |
| H | 0.586635  | 0.587928  | 2.170814  |
| H | 1.054196  | 1.976548  | 1.066193  |
| C | -0.244031 | 0.518709  | 0.211494  |
| C | -1.156382 | -0.594537 | 0.594676  |
| O | -2.168658 | -0.848194 | 0.003798  |
| H | -0.837734 | -1.179862 | 1.476592  |
| C | -0.598809 | 1.285236  | -1.016052 |
| H | 0.230661  | 1.913946  | -1.333235 |
| H | -0.886155 | 0.613311  | -1.821476 |
| H | -1.458469 | 1.922993  | -0.799059 |
| O | 1.019098  | -0.879708 | -0.741574 |
| O | 2.097173  | -0.661505 | -0.152710 |
| H | 1.674880  | 0.230070  | 0.680427  |

FREQUENCY

|            |           |           |
|------------|-----------|-----------|
| -1107.4029 | 104.9870  | 142.0448  |
| 175.4560   | 218.0918  | 250.6917  |
| 297.8716   | 405.8575  | 452.6413  |
| 508.1860   | 640.6755  | 664.4125  |
| 699.2476   | 844.4372  | 977.2822  |
| 1017.4940  | 1023.4111 | 1052.6995 |
| 1066.6596  | 1285.3074 | 1351.7751 |
| 1383.7645  | 1412.8436 | 1439.8341 |
| 1447.7141  | 1475.3992 | 1484.6200 |
| 1588.0369  | 1619.6965 | 1850.1422 |
| 2994.8687  | 3056.8158 | 3122.3407 |
| 3125.0777  | 3156.3786 | 3210.2517 |

**TS-HaddC2**

COORDINATES

|   |           |           |           |
|---|-----------|-----------|-----------|
| C | 0.678981  | 0.170965  | 1.177184  |
| H | 0.756765  | -0.717339 | 1.792884  |
| H | 1.140516  | 1.058858  | 1.587977  |
| C | -0.338363 | 0.267225  | 0.222093  |
| C | -1.328554 | -0.829829 | 0.206339  |
| O | -2.423616 | -0.743858 | -0.281598 |
| H | -0.989557 | -1.773505 | 0.680353  |
| C | -0.805406 | 1.611584  | -0.298091 |
| H | 0.028596  | 2.308342  | -0.371088 |
| H | -1.258335 | 1.504162  | -1.281648 |
| H | -1.561860 | 2.039130  | 0.359870  |

|   |          |           |           |
|---|----------|-----------|-----------|
| O | 2.213293 | -0.270471 | 0.096604  |
| O | 1.722781 | -0.429556 | -1.047352 |
| H | 0.544263 | -0.188247 | -0.754735 |

FREQUENCY

|            |           |           |
|------------|-----------|-----------|
| -1047.1125 | 109.3836  | 154.1031  |
| 178.9534   | 194.6913  | 249.9249  |
| 315.9794   | 386.5367  | 486.0638  |
| 510.9445   | 679.6565  | 708.7905  |
| 879.2249   | 891.2522  | 968.7568  |
| 1031.2032  | 1039.3921 | 1096.9996 |
| 1135.8454  | 1194.8746 | 1335.9828 |
| 1376.5344  | 1415.9737 | 1426.6702 |
| 1444.2516  | 1489.2244 | 1506.6462 |
| 1556.6927  | 1693.1368 | 1836.1406 |
| 2961.7200  | 3060.0160 | 3127.5585 |
| 3141.7845  | 3149.8272 | 3229.6132 |

**TS-HaddC3**

COORDINATES

|   |           |           |           |
|---|-----------|-----------|-----------|
| C | 2.307941  | -0.857310 | -0.427204 |
| H | 2.263970  | -1.920696 | -0.225967 |
| H | 3.182242  | -0.486703 | -0.945074 |
| C | 1.332221  | -0.044176 | -0.040317 |
| C | 0.140264  | -0.613090 | 0.680599  |
| O | -0.597173 | 0.145895  | 1.398043  |
| H | 0.250859  | -1.665846 | 0.995647  |
| C | 1.304461  | 1.432866  | -0.267489 |
| H | 2.180463  | 1.760833  | -0.821850 |
| H | 0.405959  | 1.716725  | -0.819441 |
| H | 1.256668  | 1.958612  | 0.686067  |
| O | -2.439584 | 0.300338  | -0.213567 |
| O | -1.889274 | -0.456056 | -0.967477 |
| H | -0.641227 | -0.794081 | -0.278916 |

FREQUENCY

|            |           |           |
|------------|-----------|-----------|
| -1497.3636 | 62.8679   | 82.9020   |
| 140.1027   | 175.6408  | 191.8528  |
| 270.3882   | 373.0165  | 421.9364  |
| 474.5020   | 578.0511  | 598.0634  |
| 710.9565   | 828.8079  | 896.2322  |
| 956.4586   | 973.1021  | 1033.7265 |
| 1077.2761  | 1167.3852 | 1238.5438 |
| 1310.3896  | 1344.1884 | 1414.4786 |
| 1450.8343  | 1474.1461 | 1489.9297 |
| 1565.6619  | 1673.0633 | 1730.4539 |
| 2967.8105  | 3054.4702 | 3112.4378 |

3141.6454                      3150.3549                      3227.7653  
**P-HaddO**

COORDINATES

|   |           |           |           |
|---|-----------|-----------|-----------|
| C | 1.946866  | -1.158698 | 0.259765  |
| H | 1.609792  | -2.044081 | 0.782683  |
| H | 2.979717  | -1.135359 | -0.060901 |
| C | 1.131488  | -0.142432 | 0.021612  |
| C | -0.294613 | -0.228441 | 0.468663  |
| O | -0.676306 | 0.920147  | 1.116039  |
| H | -0.501104 | -1.131019 | 1.048476  |
| C | 1.518902  | 1.118941  | -0.686761 |
| H | 0.871682  | 1.286238  | -1.548964 |
| H | 1.398672  | 1.975552  | -0.023953 |
| H | 2.551228  | 1.069420  | -1.024385 |
| O | -1.101654 | -0.384282 | -0.756876 |
| O | -2.360987 | -0.336475 | -0.469016 |
| H | -1.614272 | 0.847902  | 1.326198  |

FREQUENCY

|           |           |           |
|-----------|-----------|-----------|
| 60.4104   | 112.5823  | 149.6261  |
| 199.5613  | 267.4995  | 355.5056  |
| 387.6232  | 459.0978  | 544.2721  |
| 563.5189  | 660.4376  | 733.1491  |
| 856.8609  | 919.8995  | 975.1271  |
| 988.1533  | 1038.1428 | 1074.0986 |
| 1185.0031 | 1244.2680 | 1299.7120 |
| 1324.0687 | 1358.6958 | 1408.2098 |
| 1443.4761 | 1471.7670 | 1480.6267 |
| 1504.1830 | 1758.4205 | 3050.6864 |
| 3104.6938 | 3111.6107 | 3147.6958 |
| 3149.9657 | 3237.9694 | 3851.8880 |

**P-HaddC1**

COORDINATES

|   |           |           |           |
|---|-----------|-----------|-----------|
| C | -0.017170 | 0.506024  | 1.520689  |
| H | 0.408433  | -0.377852 | 1.990976  |
| H | -1.049375 | 0.613231  | 1.847276  |
| C | 0.006585  | 0.357847  | 0.013688  |
| C | -0.845696 | -0.817307 | -0.452506 |
| O | -1.923178 | -1.048508 | 0.009137  |
| H | -0.417770 | -1.411466 | -1.280161 |
| C | -0.432399 | 1.612699  | -0.722338 |
| H | 0.223474  | 2.440913  | -0.458351 |
| H | -0.396730 | 1.466874  | -1.801420 |
| H | -1.452115 | 1.857491  | -0.431791 |
| O | 1.365762  | 0.110364  | -0.436663 |
| O | 1.790474  | -1.053169 | -0.052634 |



H 0.551702 1.385731 1.817552

FREQUENCY

|           |           |           |
|-----------|-----------|-----------|
| 65.0503   | 163.4617  | 206.6239  |
| 233.5981  | 252.6664  | 296.5427  |
| 311.8935  | 354.7296  | 421.4874  |
| 536.1459  | 632.3139  | 783.5739  |
| 894.7496  | 944.6610  | 964.5531  |
| 1007.2463 | 1043.6153 | 1194.0633 |
| 1257.5852 | 1275.4071 | 1297.4119 |
| 1395.7359 | 1402.3968 | 1419.8022 |
| 1478.5807 | 1486.9841 | 1498.1418 |
| 1513.5836 | 1877.0465 | 3019.3041 |
| 3060.8935 | 3069.6969 | 3139.3751 |
| 3153.2299 | 3155.6952 | 3157.4761 |

**P-HaddC2**

COORDINATES

|   |           |           |           |
|---|-----------|-----------|-----------|
| C | 0.671561  | -0.510444 | 0.670571  |
| H | 0.782799  | -1.587435 | 0.541460  |
| H | 0.439183  | -0.278768 | 1.709495  |
| C | -0.357508 | 0.082928  | -0.281875 |
| C | -1.609166 | -0.762120 | -0.220257 |
| O | -2.698529 | -0.334228 | 0.031304  |
| H | -1.461657 | -1.839945 | -0.430690 |
| C | -0.631761 | 1.551692  | -0.012244 |
| H | 0.290008  | 2.127817  | -0.068074 |
| H | -1.339990 | 1.948214  | -0.736405 |
| H | -1.069122 | 1.680125  | 0.977660  |
| O | 1.967365  | 0.083029  | 0.452989  |
| O | 2.464892  | -0.268537 | -0.689411 |
| H | 0.050206  | -0.064457 | -1.289677 |

FREQUENCY

|           |           |           |
|-----------|-----------|-----------|
| 72.6871   | 83.8939   | 138.3119  |
| 245.0466  | 256.9138  | 282.1042  |
| 359.1542  | 414.5658  | 569.7391  |
| 687.7556  | 830.4889  | 905.1666  |
| 952.4478  | 955.9703  | 1000.3710 |
| 1110.2545 | 1169.4345 | 1191.3382 |
| 1252.0428 | 1291.8094 | 1320.7296 |
| 1378.1075 | 1403.9354 | 1418.8225 |
| 1440.4404 | 1492.6080 | 1502.1847 |
| 1507.3264 | 1870.1341 | 2961.8578 |
| 3043.5463 | 3074.5010 | 3091.6713 |
| 3147.2257 | 3159.8743 | 3162.6844 |

**P-HaddC3**

COORDINATES

|   |           |           |           |
|---|-----------|-----------|-----------|
| C | -1.462808 | -0.998062 | -0.162154 |
| H | -1.241628 | -2.057927 | -0.164877 |
| H | -2.488868 | -0.706827 | -0.344146 |
| C | -0.515499 | -0.097158 | 0.055622  |
| C | 0.899331  | -0.539586 | 0.339762  |
| O | 1.860520  | 0.112162  | -0.379756 |
| H | 1.013566  | -1.628917 | 0.266782  |
| C | -0.745631 | 1.382691  | 0.053580  |
| H | -1.786552 | 1.619293  | -0.154161 |
| H | -0.473614 | 1.814522  | 1.019596  |
| H | -0.114328 | 1.861454  | -0.694802 |
| H | 1.154907  | -0.286206 | 1.388795  |

FREQUENCY

|           |           |           |
|-----------|-----------|-----------|
| 70.6732   | 159.5924  | 261.3124  |
| 392.3386  | 416.0322  | 562.6579  |
| 710.0206  | 806.5338  | 839.7360  |
| 962.2056  | 978.0204  | 1020.8065 |
| 1061.4772 | 1091.3897 | 1162.3565 |
| 1303.6370 | 1330.2277 | 1371.8624 |
| 1409.6506 | 1455.2539 | 1478.3962 |
| 1495.2496 | 1752.3147 | 2922.4256 |
| 3033.4236 | 3040.4799 | 3103.2927 |
| 3144.8633 | 3151.0852 | 3228.9035 |

**TS-OaddC1**

COORDINATES

|   |           |           |           |
|---|-----------|-----------|-----------|
| C | 0.508448  | -0.582657 | 1.133746  |
| H | 0.429987  | -1.649203 | 1.301985  |
| H | 1.227463  | -0.050344 | 1.739647  |
| C | -0.516021 | 0.081585  | 0.515001  |
| C | -1.572486 | -0.712930 | -0.118028 |
| O | -2.484957 | -0.227856 | -0.742507 |
| H | -1.487225 | -1.807353 | 0.010679  |
| C | -0.552293 | 1.558909  | 0.335253  |
| H | 0.273646  | 2.043787  | 0.849359  |
| H | -0.511881 | 1.810511  | -0.728294 |
| H | -1.498993 | 1.963568  | 0.697219  |
| O | 1.753436  | -0.805494 | -0.335023 |
| O | 2.292489  | 0.403252  | -0.623760 |
| H | 1.873368  | 0.660378  | -1.456097 |

FREQUENCY

|           |          |          |
|-----------|----------|----------|
| -651.5267 | 71.3894  | 112.1226 |
| 139.8940  | 155.9693 | 221.9037 |
| 265.5501  | 301.9823 | 417.0506 |

|           |           |           |
|-----------|-----------|-----------|
| 460.6083  | 487.9490  | 638.2273  |
| 843.9586  | 888.4615  | 973.4523  |
| 983.4632  | 1020.7875 | 1034.7537 |
| 1059.1621 | 1111.6056 | 1338.6594 |
| 1378.1515 | 1419.4128 | 1438.2491 |
| 1441.1086 | 1468.7178 | 1488.8352 |
| 1573.9993 | 1783.4230 | 3004.1423 |
| 3045.6476 | 3103.5762 | 3149.1546 |
| 3163.3061 | 3242.1602 | 3775.6030 |

**TS-OaddC2**

COORDINATES

|   |           |           |           |
|---|-----------|-----------|-----------|
| C | -1.923718 | -0.227564 | -0.651987 |
| H | -2.082421 | 0.182040  | -1.640315 |
| H | -2.653055 | -0.925133 | -0.268289 |
| C | -0.767910 | 0.062283  | 0.058108  |
| C | 0.044904  | 1.209915  | -0.440577 |
| O | 0.961509  | 1.687469  | 0.175008  |
| H | -0.213621 | 1.557849  | -1.456187 |
| C | -0.646543 | -0.293898 | 1.506446  |
| H | 0.397509  | -0.339888 | 1.802648  |
| H | -1.131552 | 0.475173  | 2.108239  |
| H | -1.121628 | -1.252658 | 1.702484  |
| O | 0.493395  | -1.044773 | -0.785597 |
| O | 1.603813  | -1.129275 | -0.002453 |
| H | 2.094637  | -0.309170 | -0.176189 |

FREQUENCY

|           |           |           |
|-----------|-----------|-----------|
| -691.6343 | 126.5183  | 136.1731  |
| 191.1319  | 237.5539  | 253.6974  |
| 300.7230  | 355.9982  | 402.0773  |
| 425.2552  | 505.5715  | 542.3418  |
| 626.8736  | 827.4366  | 852.1644  |
| 970.9917  | 1006.0836 | 1012.8920 |
| 1038.2293 | 1070.2454 | 1324.7087 |
| 1355.5008 | 1412.3907 | 1441.4306 |
| 1470.6747 | 1478.3626 | 1499.5070 |
| 1527.1320 | 1824.2062 | 3008.6985 |
| 3066.4961 | 3137.9022 | 3172.6008 |
| 3174.6509 | 3279.4174 | 3710.0411 |

**TS-OaddC3**

COORDINATES

|   |           |           |           |
|---|-----------|-----------|-----------|
| C | 1.828833  | -1.103387 | -0.309252 |
| H | 1.590399  | -2.123342 | -0.033907 |
| H | 2.735682  | -0.942041 | -0.876483 |
| C | 1.035439  | -0.096987 | 0.031443  |
| C | -0.193563 | -0.411973 | 0.831010  |

|   |           |           |           |
|---|-----------|-----------|-----------|
| O | -0.786117 | 0.524627  | 1.468574  |
| H | -0.189832 | -1.419936 | 1.265689  |
| C | 1.298563  | 1.343383  | -0.275682 |
| H | 0.480466  | 1.767418  | -0.856179 |
| H | 1.362619  | 1.919154  | 0.647981  |
| H | 2.226887  | 1.453337  | -0.831560 |
| O | -1.451093 | -0.709942 | -0.232758 |
| O | -1.480564 | 0.214728  | -1.228960 |
| H | -2.279670 | 0.723890  | -1.035511 |

FREQUENCY

|           |           |           |
|-----------|-----------|-----------|
| -751.5370 | 68.6578   | 145.0198  |
| 159.2315  | 206.4593  | 277.5128  |
| 305.1669  | 397.9416  | 429.1538  |
| 434.7103  | 552.8763  | 647.1829  |
| 738.8988  | 855.8259  | 967.8509  |
| 975.3627  | 985.9314  | 1041.8710 |
| 1069.9287 | 1221.1119 | 1319.9516 |
| 1343.2852 | 1409.4939 | 1418.2765 |
| 1452.8045 | 1460.0862 | 1476.6453 |
| 1494.8273 | 1739.5576 | 3057.5254 |
| 3060.7791 | 3122.0478 | 3144.8853 |
| 3146.0697 | 3231.7453 | 3798.7439 |

**P-OaddC1**

COORDINATES

|   |           |           |           |
|---|-----------|-----------|-----------|
| C | 0.848377  | -0.053938 | 1.010407  |
| H | 0.726117  | -0.751649 | 1.842174  |
| H | 1.345954  | 0.848564  | 1.370449  |
| C | -0.464734 | 0.266651  | 0.368200  |
| C | -1.361110 | -0.817928 | 0.080476  |
| O | -2.429139 | -0.684003 | -0.496736 |
| H | -1.028789 | -1.815346 | 0.416748  |
| C | -0.798682 | 1.658800  | -0.007941 |
| H | -0.798653 | 2.303961  | 0.875336  |
| H | -0.030623 | 2.054764  | -0.678262 |
| H | -1.771391 | 1.710010  | -0.489479 |
| O | 1.715468  | -0.753358 | 0.129260  |
| O | 2.034952  | 0.141489  | -0.927083 |
| H | 1.644042  | -0.304845 | -1.687354 |

FREQUENCY

|          |          |          |
|----------|----------|----------|
| 34.0953  | 115.6277 | 149.3575 |
| 175.0723 | 242.6222 | 280.7853 |
| 295.8334 | 356.1811 | 414.3945 |
| 530.2613 | 667.9791 | 830.5553 |
| 931.2454 | 958.7270 | 982.1693 |

|           |           |           |
|-----------|-----------|-----------|
| 1000.3844 | 1037.0828 | 1089.9199 |
| 1265.0095 | 1277.6794 | 1348.5523 |
| 1392.1251 | 1413.7790 | 1414.2495 |
| 1436.7131 | 1476.5704 | 1483.1764 |
| 1487.3220 | 1654.3771 | 2998.3462 |
| 3033.4363 | 3060.6387 | 3082.9566 |
| 3113.4882 | 3153.9276 | 3842.8867 |

**P-OaddC2**

COORDINATES

|   |           |           |           |
|---|-----------|-----------|-----------|
| C | 0.625754  | 1.591806  | -0.772961 |
| H | 0.267781  | 1.803044  | -1.768888 |
| H | 1.496741  | 2.100336  | -0.392056 |
| C | 0.066140  | 0.447685  | -0.013886 |
| C | 0.805848  | -0.794249 | -0.532821 |
| O | 1.739253  | -1.300017 | 0.015132  |
| H | 0.422743  | -1.157371 | -1.506296 |
| C | 0.203350  | 0.593600  | 1.490247  |
| H | -0.244982 | -0.261687 | 1.990023  |
| H | 1.258244  | 0.632832  | 1.754102  |
| H | -0.290904 | 1.507101  | 1.814649  |
| O | -1.290684 | 0.350446  | -0.433210 |
| O | -1.809874 | -0.851054 | 0.133387  |
| H | -2.225732 | -1.252311 | -0.637470 |

FREQUENCY

|           |           |           |
|-----------|-----------|-----------|
| 97.3615   | 158.5612  | 177.5724  |
| 222.6409  | 231.6693  | 240.9701  |
| 298.5404  | 313.3889  | 364.5250  |
| 427.5790  | 518.9196  | 559.4765  |
| 604.9436  | 789.4291  | 900.9214  |
| 968.8734  | 982.3988  | 1003.0901 |
| 1044.5353 | 1165.9902 | 1237.5640 |
| 1271.6368 | 1390.1264 | 1406.1922 |
| 1414.6395 | 1443.7534 | 1489.2868 |
| 1497.1303 | 1865.7949 | 2967.1217 |
| 3070.7046 | 3153.9261 | 3163.1442 |
| 3175.2998 | 3294.1012 | 3868.6997 |

**P-OaddC3**

COORDINATES

|   |           |           |           |
|---|-----------|-----------|-----------|
| C | 1.924444  | -0.935769 | -0.450243 |
| H | 1.753798  | -2.003592 | -0.429798 |
| H | 2.866940  | -0.590711 | -0.854865 |
| C | 1.018930  | -0.070719 | -0.020242 |
| C | -0.312075 | -0.623318 | 0.506348  |
| O | -0.702349 | 0.107129  | 1.566959  |
| H | -0.157970 | -1.665611 | 0.820790  |

|   |           |           |           |
|---|-----------|-----------|-----------|
| C | 1.209735  | 1.416219  | -0.018604 |
| H | 0.476804  | 1.895890  | -0.665463 |
| H | 1.075943  | 1.818483  | 0.986318  |
| H | 2.209896  | 1.667182  | -0.365216 |
| O | -1.312763 | -0.741875 | -0.486201 |
| O | -1.607032 | 0.548951  | -0.983394 |
| H | -2.294464 | 0.846241  | -0.374232 |

FREQUENCY

|           |           |           |
|-----------|-----------|-----------|
| 13.8004   | 144.4455  | 184.4972  |
| 224.7086  | 263.2945  | 308.8961  |
| 366.3584  | 399.2584  | 483.4026  |
| 545.7253  | 702.5949  | 749.2627  |
| 846.1783  | 948.2119  | 971.8671  |
| 991.0515  | 1023.3498 | 1063.9728 |
| 1076.4856 | 1101.7823 | 1147.1626 |
| 1282.5379 | 1335.3548 | 1408.8895 |
| 1430.1895 | 1454.2359 | 1480.2783 |
| 1501.4603 | 1739.7224 | 3030.9177 |
| 3059.6724 | 3127.3437 | 3145.0735 |
| 3156.6859 | 3242.4432 | 3816.7964 |

**TS-absH-CHO**

COORDINATES

|   |           |           |           |
|---|-----------|-----------|-----------|
| C | -0.526413 | -1.620165 | -0.268183 |
| H | 0.528750  | -1.680166 | -0.500136 |
| H | -1.087585 | -2.543458 | -0.204427 |
| C | -1.115309 | -0.445705 | -0.063447 |
| C | -0.271226 | 0.770174  | -0.168903 |
| O | -0.624025 | 1.890472  | -0.012962 |
| H | 0.944623  | 0.506938  | -0.438581 |
| C | -2.558388 | -0.223799 | 0.272759  |
| H | -2.650555 | 0.285850  | 1.231879  |
| H | -3.027654 | 0.417290  | -0.473457 |
| H | -3.091845 | -1.170293 | 0.318568  |
| O | 2.164062  | 0.138623  | -0.583567 |
| O | 2.499595  | -0.407736 | 0.636062  |
| H | 2.895224  | 0.329935  | 1.116536  |

FREQUENCY

|            |           |           |
|------------|-----------|-----------|
| -1848.5478 | 57.2878   | 76.3998   |
| 121.3339   | 150.7109  | 160.2788  |
| 266.1606   | 306.9374  | 413.1549  |
| 433.7175   | 468.7957  | 550.2850  |
| 652.3722   | 754.6331  | 864.2477  |
| 984.1621   | 1023.9532 | 1031.9480 |
| 1071.7712  | 1106.5074 | 1231.5169 |

|           |           |           |
|-----------|-----------|-----------|
| 1305.0210 | 1367.9893 | 1412.9560 |
| 1419.6135 | 1458.2506 | 1473.4847 |
| 1494.9008 | 1725.9724 | 1913.3174 |
| 3055.9042 | 3119.4894 | 3146.9817 |
| 3153.3040 | 3247.2898 | 3804.8266 |

**TS-absH-CH<sub>3</sub>**

COORDINATES

|   |           |           |           |
|---|-----------|-----------|-----------|
| C | -2.447205 | -0.613453 | -0.368742 |
| H | -3.114499 | 0.094454  | -0.843669 |
| H | -2.771838 | -1.643462 | -0.312749 |
| C | -1.266330 | -0.216340 | 0.125505  |
| C | -0.910631 | 1.212814  | -0.055404 |
| O | 0.173207  | 1.675827  | 0.194568  |
| H | -1.715350 | 1.852966  | -0.456599 |
| C | -0.280472 | -1.083297 | 0.754114  |
| H | 0.747024  | -1.088560 | -0.098376 |
| H | 0.279047  | -0.643640 | 1.576130  |
| H | -0.575139 | -2.115667 | 0.902629  |
| O | 1.689183  | -0.782708 | -0.745610 |
| O | 2.459181  | -0.028761 | 0.100709  |
| H | 2.006026  | 0.830698  | 0.102468  |

FREQUENCY

|            |           |           |
|------------|-----------|-----------|
| -2015.0120 | 81.5509   | 132.9726  |
| 165.0620   | 182.7217  | 189.7317  |
| 292.9199   | 395.8194  | 449.0540  |
| 536.9565   | 590.2022  | 637.1575  |
| 655.7650   | 705.7759  | 870.6679  |
| 965.8048   | 984.3194  | 986.7105  |
| 1027.2215  | 1056.0275 | 1111.7143 |
| 1193.0992  | 1354.6310 | 1395.4723 |
| 1444.4533  | 1457.2180 | 1482.6144 |
| 1495.2531  | 1672.2636 | 1821.9845 |
| 3015.5437  | 3105.3438 | 3151.0961 |
| 3200.3765  | 3243.4318 | 3693.8914 |

**TS-absH-CH<sub>2</sub>**

COORDINATES

|   |           |           |           |
|---|-----------|-----------|-----------|
| C | -0.163149 | -1.143732 | -0.146447 |
| H | -0.044500 | -2.209890 | 0.001115  |
| H | -1.506868 | -0.753669 | -0.377651 |
| C | 0.717308  | -0.166773 | -0.120248 |
| C | 2.138584  | -0.544090 | 0.168654  |
| O | 3.023057  | 0.263119  | 0.222238  |
| H | 2.325360  | -1.619550 | 0.331538  |
| C | 0.444173  | 1.287389  | -0.353012 |
| H | -0.606743 | 1.460513  | -0.563624 |

|   |           |           |           |
|---|-----------|-----------|-----------|
| H | 0.740432  | 1.861133  | 0.524651  |
| H | 1.054473  | 1.641807  | -1.183342 |
| O | -2.538567 | -0.374395 | -0.478072 |
| O | -2.691047 | 0.495140  | 0.595081  |
| H | -3.131191 | -0.048025 | 1.259660  |

FREQUENCY

|            |           |           |
|------------|-----------|-----------|
| -1546.7493 | 54.2740   | 83.0198   |
| 100.9911   | 152.8354  | 181.7653  |
| 231.5935   | 278.8593  | 353.7400  |
| 412.3194   | 436.4370  | 586.3292  |
| 660.7750   | 739.6873  | 835.6723  |
| 920.7146   | 995.5452  | 1021.8512 |
| 1076.6500  | 1078.0990 | 1106.3657 |
| 1281.4008  | 1406.5142 | 1412.1461 |
| 1425.0855  | 1433.1693 | 1482.1891 |
| 1486.2675  | 1694.9199 | 1835.4159 |
| 3003.3778  | 3070.1371 | 3132.5934 |
| 3180.1451  | 3198.1314 | 3820.1844 |

**TS-absCH<sub>3</sub>**

COORDINATES

|   |           |           |           |
|---|-----------|-----------|-----------|
| C | -1.954190 | -1.649232 | -0.178576 |
| H | -3.032291 | -1.672815 | -0.325261 |
| H | -1.440665 | -2.603192 | -0.164356 |
| C | -1.323168 | -0.503762 | -0.027666 |
| C | -1.973283 | 0.815740  | -0.039580 |
| O | -1.415728 | 1.867142  | 0.112774  |
| H | -3.069043 | 0.768958  | -0.206394 |
| C | 0.639922  | -0.439407 | 0.230101  |
| H | 0.496302  | -1.127191 | 1.052291  |
| H | 0.716005  | -0.826935 | -0.775316 |
| H | 0.496797  | 0.621900  | 0.387836  |
| O | 2.336875  | -0.409324 | 0.479019  |
| O | 2.896245  | 0.327270  | -0.552628 |
| H | 2.958080  | 1.218535  | -0.187794 |

FREQUENCY

|            |           |           |
|------------|-----------|-----------|
| -1152.0275 | 53.5567   | 103.0949  |
| 132.7081   | 135.2600  | 189.8824  |
| 221.4653   | 280.9652  | 354.7424  |
| 380.2722   | 423.0639  | 488.1572  |
| 593.0719   | 615.6408  | 904.3499  |
| 982.7431   | 998.0276  | 1020.1259 |
| 1120.7995  | 1212.3795 | 1225.6433 |
| 1240.8621  | 1373.6940 | 1379.3306 |
| 1396.7493  | 1418.0109 | 1432.7362 |



|           |           |           |
|-----------|-----------|-----------|
| 1700.5628 | 1827.2074 | 2947.5890 |
| 3063.8810 | 3099.3223 | 3191.3938 |
| 3232.8962 | 3246.1667 | 3810.6847 |

**H<sub>2</sub>O<sub>2</sub>**

COORDINATES

|   |           |           |           |
|---|-----------|-----------|-----------|
| H | 1.019091  | 0.632758  | 0.459120  |
| O | 0.700530  | -0.115093 | -0.057358 |
| O | -0.700456 | 0.115051  | -0.057441 |
| H | -1.019684 | -0.632426 | 0.459271  |

FREQUENCY

|           |           |           |
|-----------|-----------|-----------|
| 380.1509  | 1048.6605 | 1365.8757 |
| 1481.2339 | 3855.2713 | 3856.5525 |

**P-absH-CHO**

COORDINATES

|   |           |           |           |
|---|-----------|-----------|-----------|
| C | -1.490497 | -0.949881 | 0.000034  |
| H | -1.311109 | -2.016214 | 0.000107  |
| H | -2.515691 | -0.603341 | 0.000091  |
| C | -0.471378 | -0.098138 | -0.000104 |
| C | 0.901458  | -0.678012 | -0.000062 |
| O | 1.921998  | -0.093853 | 0.000050  |
| C | -0.571887 | 1.398140  | -0.000013 |
| H | -0.073720 | 1.810583  | 0.877387  |
| H | -0.069299 | 1.811073  | -0.874653 |
| H | -1.612348 | 1.716069  | -0.002461 |

FREQUENCY

|           |           |           |
|-----------|-----------|-----------|
| 140.5094  | 183.0777  | 243.4301  |
| 399.3337  | 454.7514  | 596.1893  |
| 757.7825  | 805.6721  | 961.8382  |
| 1015.1368 | 1026.1753 | 1065.8066 |
| 1267.6995 | 1406.1196 | 1438.7889 |
| 1477.8771 | 1490.1482 | 1723.8850 |
| 1967.0691 | 3053.4610 | 3116.1892 |
| 3146.6331 | 3156.9201 | 3250.6995 |

**P-absH-CH<sub>3</sub>**

COORDINATES

|   |           |           |           |
|---|-----------|-----------|-----------|
| C | 1.578180  | -0.820454 | -0.000230 |
| H | 1.436811  | -1.892148 | -0.000178 |
| H | 2.591887  | -0.447365 | -0.000426 |
| C | 0.499169  | 0.028697  | -0.000060 |
| C | -0.854503 | -0.606319 | 0.000162  |
| O | -1.886836 | 0.003334  | 0.000234  |
| H | -0.846882 | -1.712612 | 0.000259  |
| C | 0.566792  | 1.415294  | -0.000092 |
| H | -0.342785 | 1.995958  | 0.000036  |

|   |          |          |           |
|---|----------|----------|-----------|
| H | 1.517835 | 1.926188 | -0.000239 |
|---|----------|----------|-----------|

FREQUENCY

|           |           |           |
|-----------|-----------|-----------|
| 150.4856  | 297.4975  | 399.2788  |
| 456.3057  | 531.0590  | 597.5290  |
| 609.6481  | 820.8124  | 864.6370  |
| 896.1264  | 976.7955  | 1037.5517 |
| 1038.2142 | 1315.6353 | 1368.0571 |
| 1437.7276 | 1480.6717 | 1537.6311 |
| 1854.2658 | 2981.2139 | 3161.2594 |
| 3173.0371 | 3260.8315 | 3286.2289 |

**P-absH-CH<sub>2</sub>**

COORDINATES

|   |           |           |           |
|---|-----------|-----------|-----------|
| C | 1.499552  | -1.029382 | -0.000139 |
| H | 1.538724  | -2.107510 | -0.000133 |
| C | 0.547041  | -0.127741 | -0.000062 |
| C | -0.865626 | -0.610891 | 0.000067  |
| O | -1.807843 | 0.133179  | 0.000180  |
| H | -0.996437 | -1.707015 | 0.000104  |
| C | 0.748470  | 1.359129  | -0.000071 |
| H | 1.805491  | 1.609208  | -0.000309 |
| H | 0.268960  | 1.796627  | -0.875175 |
| H | 0.269387  | 1.796572  | 0.875298  |

FREQUENCY

|           |           |           |
|-----------|-----------|-----------|
| 149.8786  | 177.5353  | 258.7334  |
| 366.5676  | 424.5187  | 623.5116  |
| 751.3409  | 825.2164  | 854.7943  |
| 991.1970  | 1044.1890 | 1072.1551 |
| 1240.7193 | 1406.2700 | 1417.7899 |
| 1477.4895 | 1481.5741 | 1685.9237 |
| 1830.0819 | 2999.5099 | 3061.5059 |
| 3124.2769 | 3165.0212 | 3244.5091 |

**P-absCH<sub>3</sub>-a (CH<sub>2</sub>CCHO)**

COORDINATES

|   |           |           |           |
|---|-----------|-----------|-----------|
| C | 1.810573  | 0.031720  | 0.000293  |
| H | 2.016774  | 1.101569  | 0.000090  |
| H | 2.666149  | -0.632221 | -0.000413 |
| C | 0.578637  | -0.410573 | -0.000239 |
| C | -0.695377 | 0.312086  | -0.000157 |
| O | -1.784948 | -0.185456 | 0.000159  |
| H | -0.566333 | 1.414899  | -0.000336 |

FREQUENCY

|          |          |          |
|----------|----------|----------|
| 104.2980 | 255.1123 | 492.4773 |
| 565.1130 | 878.8542 | 977.7285 |

|           |           |           |
|-----------|-----------|-----------|
| 1008.8091 | 1122.0798 | 1382.3274 |
| 1427.4369 | 1721.5763 | 1833.1290 |
| 2928.2390 | 3091.2091 | 3206.0790 |

**P-absCH<sub>3</sub>-b (CH<sub>3</sub>OOH)**

COORDINATES

|   |           |           |           |
|---|-----------|-----------|-----------|
| C | 1.117698  | -0.220514 | 0.021207  |
| H | 1.961384  | 0.467460  | 0.018623  |
| H | 1.159276  | -0.863313 | -0.858510 |
| H | 1.135595  | -0.829393 | 0.927303  |
| O | -0.026420 | 0.600062  | -0.018047 |
| O | -1.146805 | -0.267373 | -0.102117 |
| H | -1.576648 | -0.113178 | 0.746653  |

FREQUENCY

|           |           |           |
|-----------|-----------|-----------|
| 196.4808  | 267.9565  | 470.5379  |
| 958.5349  | 1119.6229 | 1187.0421 |
| 1228.9856 | 1412.8314 | 1462.7468 |
| 1479.3561 | 1518.6976 | 3051.6266 |
| 3127.3064 | 3147.2225 | 3845.0343 |

**MVK + HO<sub>2</sub> reaction:**

**MVK**

COORDINATES

|   |           |           |           |
|---|-----------|-----------|-----------|
| C | 1.918298  | 0.168341  | -0.000032 |
| H | 2.929394  | -0.214727 | -0.000042 |
| H | 1.803757  | 1.244665  | -0.000095 |
| C | 0.871296  | -0.645370 | 0.000050  |
| C | -0.545200 | -0.188714 | 0.000022  |
| O | -1.434508 | -1.005644 | -0.000042 |
| H | 0.989968  | -1.721965 | 0.000105  |
| C | -0.834612 | 1.293135  | 0.000019  |
| H | -0.398125 | 1.765866  | -0.880049 |
| H | -1.909715 | 1.441011  | 0.000131  |
| H | -0.397909 | 1.765942  | 0.879936  |

FREQUENCY

|           |           |           |
|-----------|-----------|-----------|
| 123.9068  | 155.1597  | 304.1300  |
| 437.7811  | 493.5704  | 545.8909  |
| 704.2306  | 781.3688  | 957.0616  |
| 1012.8439 | 1050.2386 | 1055.8183 |
| 1076.1535 | 1280.3245 | 1314.4376 |
| 1398.2037 | 1453.8963 | 1479.4173 |
| 1484.2326 | 1716.6360 | 1820.0425 |
| 3058.2900 | 3124.8519 | 3158.2876 |
| 3173.3725 | 3190.8962 | 3244.2175 |

**Com1**

## COORDINATES

|   |           |           |           |
|---|-----------|-----------|-----------|
| C | 1.719778  | 1.796208  | -0.000363 |
| H | 1.554612  | 2.864665  | -0.000621 |
| H | 2.749194  | 1.461417  | -0.000305 |
| C | 0.700702  | 0.945983  | -0.000176 |
| C | 0.870512  | -0.523473 | 0.000127  |
| O | -0.109272 | -1.247032 | 0.000447  |
| H | -0.330288 | 1.282279  | -0.000290 |
| C | 2.249762  | -1.122309 | 0.000105  |
| H | 2.167149  | -2.204185 | 0.000299  |
| H | 2.803139  | -0.794251 | -0.879809 |
| H | 2.803315  | -0.793962 | 0.879801  |
| O | -2.610628 | 0.801012  | 0.000207  |
| O | -2.685845 | -0.500885 | -0.000304 |
| H | -1.745690 | -0.819172 | -0.000025 |

## FREQUENCY

|           |           |           |
|-----------|-----------|-----------|
| 55.9091   | 75.0391   | 93.6570   |
| 148.6986  | 150.5155  | 176.5327  |
| 227.0628  | 309.7712  | 452.9691  |
| 511.2730  | 560.5924  | 702.2588  |
| 738.4427  | 797.0527  | 968.1365  |
| 1028.4807 | 1057.1393 | 1076.6726 |
| 1083.0658 | 1306.2091 | 1308.5669 |
| 1329.2617 | 1401.4077 | 1457.0112 |
| 1480.3856 | 1481.4944 | 1595.9105 |
| 1711.4004 | 1787.9485 | 3065.3875 |
| 3133.6655 | 3161.4771 | 3177.3908 |
| 3190.6338 | 3248.6447 | 3285.1356 |

**Com2**

## COORDINATES

|   |           |           |           |
|---|-----------|-----------|-----------|
| C | 2.933948  | 0.281832  | -0.428840 |
| H | 3.897635  | -0.020537 | -0.814461 |
| H | 2.797482  | 1.335556  | -0.223860 |
| C | 1.966799  | -0.602915 | -0.226168 |
| C | 0.619292  | -0.251471 | 0.278337  |
| O | -0.210272 | -1.136611 | 0.381225  |
| H | 2.103544  | -1.655297 | -0.440562 |
| C | 0.308434  | 1.172491  | 0.644280  |
| H | -0.673192 | 1.229239  | 1.103211  |
| H | 1.062838  | 1.565469  | 1.324898  |
| H | 0.306650  | 1.786531  | -0.256866 |
| O | -2.395935 | 0.579020  | -0.795191 |
| O | -2.720020 | -0.328874 | 0.084885  |
| H | -1.855984 | -0.748863 | 0.334632  |

FREQUENCY

|           |           |           |
|-----------|-----------|-----------|
| 38.6602   | 93.6608   | 112.6520  |
| 140.4793  | 175.5613  | 225.2633  |
| 245.2993  | 313.0984  | 443.0482  |
| 501.4091  | 562.6334  | 705.8224  |
| 724.7231  | 792.6379  | 958.6602  |
| 1025.8872 | 1050.7596 | 1059.6605 |
| 1077.2925 | 1296.1310 | 1298.5996 |
| 1319.6405 | 1407.8987 | 1449.7103 |
| 1473.8532 | 1486.0524 | 1583.9751 |
| 1715.5383 | 1787.9734 | 3073.0564 |
| 3144.3524 | 3160.0100 | 3177.3569 |
| 3193.0427 | 3246.6694 | 3288.0906 |

**Com3**

COORDINATES

|   |           |           |           |
|---|-----------|-----------|-----------|
| C | -0.214467 | 1.695963  | 0.551977  |
| H | -0.675029 | 2.656339  | 0.361046  |
| H | -0.498796 | 1.190712  | 1.465263  |
| C | 0.653705  | 1.163771  | -0.303114 |
| C | 1.330294  | -0.153173 | -0.101458 |
| O | 2.079429  | -0.563693 | -0.954224 |
| H | 0.936783  | 1.673810  | -1.216974 |
| C | 1.046803  | -0.929003 | 1.158965  |
| H | 1.606598  | -1.858332 | 1.133915  |
| H | 1.337845  | -0.346244 | 2.033655  |
| H | -0.020447 | -1.139760 | 1.245546  |
| O | -2.345385 | -0.528297 | 0.365096  |
| O | -2.020871 | -0.528132 | -0.896330 |
| H | -1.290353 | 0.119109  | -0.977006 |

FREQUENCY

|           |           |           |
|-----------|-----------|-----------|
| 40.8844   | 75.6250   | 92.3227   |
| 124.4086  | 175.8559  | 188.1432  |
| 200.6490  | 300.9174  | 404.3988  |
| 456.8308  | 493.7590  | 542.5363  |
| 707.3665  | 778.7260  | 956.3674  |
| 1035.6990 | 1055.0103 | 1059.1725 |
| 1077.7070 | 1273.8899 | 1283.3711 |
| 1310.7280 | 1402.7352 | 1453.1193 |
| 1478.6942 | 1485.1786 | 1488.4538 |
| 1707.5603 | 1826.6555 | 3061.4194 |
| 3129.3813 | 3159.2701 | 3174.5987 |
| 3177.2311 | 3248.3303 | 3561.0351 |

**Com4**

COORDINATES

|   |           |           |           |
|---|-----------|-----------|-----------|
| C | -0.079409 | 1.952910  | 0.177828  |
| H | -0.550545 | 2.841663  | -0.221549 |
| H | -0.023867 | 1.868582  | 1.256497  |
| C | 0.440473  | 1.026776  | -0.621892 |
| C | 1.170739  | -0.190238 | -0.149480 |
| O | 1.757484  | -0.866459 | -0.955741 |
| H | 0.404156  | 1.126063  | -1.700707 |
| C | 1.180926  | -0.503839 | 1.324848  |
| H | 1.679964  | -1.455424 | 1.477466  |
| H | 1.715206  | 0.276998  | 1.868418  |
| H | 0.164925  | -0.553845 | 1.715691  |
| O | -1.578001 | -1.205548 | -0.191665 |
| O | -2.404676 | -0.228386 | 0.052705  |
| H | -1.864677 | 0.585455  | -0.026038 |

FREQUENCY

|           |           |           |
|-----------|-----------|-----------|
| 47.0826   | 76.4842   | 91.3646   |
| 131.5113  | 151.7421  | 189.1058  |
| 204.2967  | 294.3138  | 425.2302  |
| 466.0304  | 492.4346  | 541.8437  |
| 718.8776  | 775.9908  | 953.6998  |
| 1009.6312 | 1052.6241 | 1063.4938 |
| 1076.8449 | 1275.5090 | 1279.5682 |
| 1310.2388 | 1400.8063 | 1446.9627 |
| 1479.9918 | 1483.3447 | 1498.6537 |
| 1703.3332 | 1835.2332 | 3065.7845 |
| 3133.3314 | 3145.6261 | 3178.8929 |
| 3185.8028 | 3232.9356 | 3554.0187 |

**Com5**

COORDINATES

|   |           |           |           |
|---|-----------|-----------|-----------|
| C | -0.247047 | 1.726294  | 0.139323  |
| H | -0.140212 | 2.802036  | 0.099677  |
| H | 0.645067  | 1.152070  | 0.356802  |
| C | -1.423300 | 1.147067  | -0.061910 |
| C | -1.646046 | -0.323346 | -0.019183 |
| O | -2.759416 | -0.764165 | -0.183487 |
| H | -2.315446 | 1.724502  | -0.271765 |
| C | -0.464230 | -1.230075 | 0.222009  |
| H | 0.279843  | -1.093779 | -0.563295 |
| H | 0.022237  | -0.987972 | 1.167087  |
| H | -0.808042 | -2.259639 | 0.233690  |
| O | 2.688551  | -0.185228 | 0.631887  |
| O | 2.744660  | -0.143487 | -0.671733 |
| H | 3.609927  | -0.513826 | -0.916961 |

FREQUENCY

|           |           |           |
|-----------|-----------|-----------|
| 40.9477   | 53.0211   | 71.7687   |
| 73.7447   | 105.8069  | 130.0671  |
| 144.7593  | 229.9207  | 307.9540  |
| 447.3131  | 495.4795  | 547.3970  |
| 710.3853  | 784.1151  | 960.6358  |
| 1027.6781 | 1053.5305 | 1057.8749 |
| 1078.3007 | 1268.1264 | 1283.5988 |
| 1317.7643 | 1401.9530 | 1454.4210 |
| 1463.5057 | 1482.1519 | 1485.2929 |
| 1717.2305 | 1819.7919 | 3066.3087 |
| 3134.9045 | 3159.0530 | 3176.5042 |
| 3189.4484 | 3246.6267 | 3677.7844 |

**TS-HaddO**

COORDINATES

|   |           |           |           |
|---|-----------|-----------|-----------|
| C | 2.363603  | -0.638541 | -0.222960 |
| H | 3.092391  | -1.431932 | -0.135979 |
| H | 2.647025  | 0.226223  | -0.808179 |
| C | 1.183736  | -0.725271 | 0.373619  |
| C | 0.147808  | 0.332738  | 0.335111  |
| O | -0.697616 | 0.357344  | 1.292207  |
| H | 0.914591  | -1.588243 | 0.970872  |
| C | 0.400424  | 1.592263  | -0.441462 |
| H | -0.520613 | 2.166713  | -0.493671 |
| H | 1.151062  | 2.182909  | 0.086582  |
| H | 0.761187  | 1.380226  | -1.445085 |
| O | -1.060429 | -0.518514 | -0.948183 |
| O | -2.110972 | -0.611111 | -0.244013 |
| H | -1.666925 | -0.124780 | 0.759523  |

FREQUENCY

|           |           |           |
|-----------|-----------|-----------|
| -797.5853 | 98.7972   | 125.1862  |
| 200.6829  | 252.8202  | 277.6953  |
| 322.9423  | 468.7395  | 507.0642  |
| 558.0680  | 645.4320  | 709.6715  |
| 769.8130  | 822.4889  | 984.4525  |
| 1008.2391 | 1049.3207 | 1058.0070 |
| 1067.0203 | 1092.8069 | 1310.3929 |
| 1324.0870 | 1398.6906 | 1413.4942 |
| 1456.5177 | 1473.5409 | 1488.8502 |
| 1625.2019 | 1732.3479 | 1910.3934 |
| 3059.1258 | 3136.4570 | 3166.6362 |
| 3170.2752 | 3205.3377 | 3257.0206 |

**TS-HaddC1**

COORDINATES

|   |           |          |           |
|---|-----------|----------|-----------|
| C | -0.850865 | 1.498660 | -0.265183 |
|---|-----------|----------|-----------|

|   |           |           |           |
|---|-----------|-----------|-----------|
| H | -1.457484 | 2.087318  | -0.941485 |
| H | -0.508174 | 2.016628  | 0.622771  |
| C | -0.058709 | 0.492010  | -0.799016 |
| C | 1.179994  | -0.027110 | -0.142127 |
| O | 2.008116  | -0.596584 | -0.806609 |
| H | -0.147450 | 0.200945  | -1.837440 |
| C | 1.337554  | 0.186687  | 1.341236  |
| H | 2.167623  | -0.414029 | 1.699095  |
| H | 1.545405  | 1.238940  | 1.541720  |
| H | 0.422700  | -0.078094 | 1.871426  |
| O | -1.154261 | -1.146521 | -0.142775 |
| O | -2.095487 | -0.580632 | 0.447872  |
| H | -1.737405 | 0.636706  | 0.246554  |

FREQUENCY

|            |           |           |
|------------|-----------|-----------|
| -1123.4828 | 79.7540   | 121.5065  |
| 168.9567   | 198.9190  | 304.1016  |
| 397.6646   | 479.1722  | 500.7872  |
| 539.2276   | 579.4218  | 679.4869  |
| 698.7133   | 786.3198  | 953.2570  |
| 1014.3223  | 1035.5721 | 1062.6597 |
| 1077.9219  | 1265.6761 | 1271.3182 |
| 1301.3326  | 1400.9548 | 1428.8103 |
| 1448.3311  | 1475.6287 | 1483.6128 |
| 1574.4188  | 1632.1970 | 1835.3470 |
| 3062.8184  | 3130.6766 | 3134.9430 |
| 3171.9450  | 3195.3646 | 3222.9840 |

**TS-HaddC2**

COORDINATES

|   |           |           |           |
|---|-----------|-----------|-----------|
| C | 0.829276  | -0.129869 | 1.229581  |
| H | 1.497372  | -0.691894 | 1.866952  |
| H | 0.681152  | 0.901742  | 1.518716  |
| C | -0.093403 | -0.791551 | 0.421995  |
| C | -1.352736 | -0.138599 | -0.029242 |
| O | -2.289775 | -0.801206 | -0.401132 |
| H | -0.153207 | -1.872404 | 0.477445  |
| C | -1.407377 | 1.373640  | -0.026895 |
| H | -2.272168 | 1.693988  | -0.599373 |
| H | -1.506450 | 1.738310  | 0.996827  |
| H | -0.497805 | 1.805413  | -0.446292 |
| O | 2.223039  | 0.328608  | -0.053701 |
| O | 1.775759  | -0.134131 | -1.131459 |
| H | 0.724347  | -0.603055 | -0.696574 |

FREQUENCY

|            |         |          |
|------------|---------|----------|
| -1018.7282 | 80.2398 | 117.6411 |
|------------|---------|----------|



|           |           |           |
|-----------|-----------|-----------|
| 177.0280  | 198.9546  | 310.4640  |
| 444.6965  | 481.2617  | 500.0629  |
| 566.4872  | 612.3003  | 685.3809  |
| 794.4251  | 861.4311  | 922.5157  |
| 995.4725  | 1053.7891 | 1086.4175 |
| 1136.8678 | 1238.7956 | 1250.1742 |
| 1300.4166 | 1395.2213 | 1411.4609 |
| 1427.8997 | 1477.7538 | 1486.9149 |
| 1556.5428 | 1691.0841 | 1826.4951 |
| 3056.8230 | 3122.5860 | 3156.9732 |
| 3167.8790 | 3176.5638 | 3243.0445 |

**TS-HaddC3**

COORDINATES

|   |           |           |           |
|---|-----------|-----------|-----------|
| C | 2.471419  | -0.867737 | -0.295564 |
| H | 3.139834  | -1.707109 | -0.164593 |
| H | 2.792524  | -0.087858 | -0.973360 |
| C | 1.322767  | -0.801264 | 0.360995  |
| C | 0.339214  | 0.333351  | 0.266554  |
| O | -0.461201 | 0.485887  | 1.261435  |
| H | 1.018734  | -1.586476 | 1.043733  |
| C | 0.762196  | 1.583574  | -0.502174 |
| H | -0.074142 | 2.277418  | -0.529004 |
| H | 1.596070  | 2.056697  | 0.017533  |
| H | 1.074071  | 1.353265  | -1.519168 |
| O | -2.496665 | -0.349250 | 0.088811  |
| O | -1.846526 | -0.588255 | -0.892608 |
| H | -0.485535 | -0.180546 | -0.515105 |

FREQUENCY

|            |           |           |
|------------|-----------|-----------|
| -1447.3323 | 61.5619   | 100.7645  |
| 141.6724   | 160.5558  | 209.9376  |
| 256.1831   | 298.4580  | 441.5962  |
| 459.7007   | 535.1940  | 548.2355  |
| 704.6503   | 798.2947  | 934.3355  |
| 955.8480   | 985.0892  | 1047.6026 |
| 1057.7356  | 1089.2323 | 1226.1330 |
| 1239.4774  | 1299.3745 | 1388.7505 |
| 1440.8085  | 1481.7834 | 1489.9332 |
| 1562.3498  | 1674.6373 | 1711.1496 |
| 3061.3428  | 3137.9081 | 3151.4223 |
| 3156.3667  | 3170.6213 | 3237.1195 |

**P-HaddO**

COORDINATES

|   |          |           |           |
|---|----------|-----------|-----------|
| C | 2.423631 | -0.191909 | -0.352038 |
| H | 3.318913 | -0.796741 | -0.382458 |
| H | 2.503545 | 0.821268  | -0.722641 |

|   |           |           |           |
|---|-----------|-----------|-----------|
| C | 1.292929  | -0.680254 | 0.124130  |
| C | 0.001640  | 0.073888  | 0.215631  |
| O | -0.521114 | -0.129300 | 1.472924  |
| H | 1.229835  | -1.694846 | 0.498928  |
| C | 0.035181  | 1.532083  | -0.185135 |
| H | -0.972343 | 1.939724  | -0.113827 |
| H | 0.689355  | 2.076419  | 0.491942  |
| H | 0.384930  | 1.648344  | -1.208504 |
| O | -0.884907 | -0.613130 | -0.773844 |
| O | -2.124554 | -0.331616 | -0.555445 |
| H | -1.429921 | 0.195359  | 1.471947  |

FREQUENCY

|           |           |           |
|-----------|-----------|-----------|
| 104.6615  | 138.1125  | 264.4486  |
| 277.0797  | 309.3664  | 366.6889  |
| 393.5911  | 431.5922  | 463.9915  |
| 497.5373  | 635.4495  | 685.1279  |
| 797.0703  | 846.7093  | 974.1831  |
| 1010.8812 | 1049.4648 | 1052.1900 |
| 1091.9069 | 1196.3035 | 1258.3207 |
| 1311.8586 | 1331.5925 | 1401.5342 |
| 1420.3540 | 1461.5511 | 1488.8074 |
| 1514.4215 | 1755.6943 | 3066.8402 |
| 3148.0615 | 3157.0879 | 3167.5941 |
| 3186.1061 | 3253.5035 | 3832.8093 |

**P-HaddC1**

COORDINATES

|   |           |           |           |
|---|-----------|-----------|-----------|
| C | 1.223628  | 1.491685  | -0.086456 |
| H | 0.686237  | 2.427642  | 0.041266  |
| H | 1.321135  | 1.291110  | -1.151144 |
| C | 0.443346  | 0.380766  | 0.575253  |
| C | -0.988010 | 0.241835  | 0.042449  |
| O | -1.553162 | 1.215661  | -0.374187 |
| H | 0.371438  | 0.532308  | 1.655653  |
| C | -1.638328 | -1.111734 | 0.131584  |
| H | -2.707495 | -1.001779 | -0.020186 |
| H | -1.222477 | -1.765282 | -0.635498 |
| H | -1.428611 | -1.577634 | 1.094786  |
| O | 1.140889  | -0.880764 | 0.471345  |
| O | 1.227754  | -1.272038 | -0.762404 |
| H | 2.212105  | 1.575453  | 0.360111  |

FREQUENCY

|          |          |          |
|----------|----------|----------|
| 46.9365  | 127.2328 | 173.8624 |
| 189.9536 | 240.6820 | 275.4291 |
| 335.4973 | 455.7266 | 479.3653 |

|           |           |           |
|-----------|-----------|-----------|
| 575.0704  | 680.6823  | 745.7480  |
| 896.0387  | 972.7644  | 985.2400  |
| 1070.4855 | 1107.7748 | 1151.0138 |
| 1222.0299 | 1259.9086 | 1337.7590 |
| 1382.6050 | 1394.4709 | 1407.8719 |
| 1466.7285 | 1480.6989 | 1483.7612 |
| 1498.2622 | 1861.6446 | 3060.3357 |
| 3074.5515 | 3083.4247 | 3128.4460 |
| 3157.9248 | 3163.7633 | 3173.2774 |

**P-HaddC2**

COORDINATES

|   |           |           |           |
|---|-----------|-----------|-----------|
| C | -1.113398 | -0.634746 | 0.701903  |
| H | -1.853717 | -0.494484 | 1.486789  |
| H | -0.880195 | -1.688044 | 0.570055  |
| C | 0.131696  | 0.184199  | 0.945017  |
| C | 1.256689  | -0.163243 | -0.018123 |
| O | 1.256926  | -1.197400 | -0.631821 |
| H | 0.501488  | -0.001240 | 1.957573  |
| C | 2.360254  | 0.853153  | -0.141816 |
| H | 3.192676  | 0.437074  | -0.700575 |
| H | 1.971220  | 1.730042  | -0.662791 |
| H | 2.689159  | 1.185544  | 0.843231  |
| O | -1.730514 | -0.246279 | -0.544592 |
| O | -2.192731 | 0.961988  | -0.487026 |
| H | -0.101526 | 1.248456  | 0.891350  |

FREQUENCY

|           |           |           |
|-----------|-----------|-----------|
| 52.9230   | 61.7513   | 131.5684  |
| 144.8238  | 249.9466  | 331.3691  |
| 440.2421  | 471.2826  | 540.6973  |
| 623.2303  | 774.6612  | 820.4224  |
| 927.8132  | 962.9018  | 1005.6495 |
| 1057.2820 | 1126.6062 | 1197.5509 |
| 1226.3175 | 1272.5570 | 1320.9046 |
| 1379.2881 | 1400.6988 | 1417.2730 |
| 1448.3163 | 1469.2748 | 1478.3728 |
| 1485.9078 | 1858.2320 | 3049.6100 |
| 3058.1626 | 3107.2383 | 3114.2633 |
| 3118.8073 | 3165.4016 | 3176.2998 |

**P-HaddC3**

COORDINATES

|   |           |           |           |
|---|-----------|-----------|-----------|
| C | -1.920545 | 0.156839  | -0.145988 |
| H | -2.915269 | -0.253762 | -0.249547 |
| H | -1.811096 | 1.222170  | -0.300338 |
| C | -0.892502 | -0.618918 | 0.154132  |
| C | 0.536216  | -0.155194 | 0.313398  |

|   |           |           |           |
|---|-----------|-----------|-----------|
| O | 1.400209  | -1.012424 | -0.323420 |
| H | -1.028354 | -1.685861 | 0.292310  |
| C | 0.799631  | 1.307398  | -0.022444 |
| H | 1.855569  | 1.524125  | 0.120031  |
| H | 0.539098  | 1.504404  | -1.061717 |
| H | 0.213493  | 1.967699  | 0.614858  |
| H | 0.808092  | -0.320134 | 1.377182  |

FREQUENCY

|           |           |           |
|-----------|-----------|-----------|
| 113.4811  | 241.1315  | 304.3991  |
| 381.7769  | 417.9776  | 515.1024  |
| 674.3202  | 805.7015  | 946.6181  |
| 985.4506  | 999.2555  | 1027.2888 |
| 1044.5244 | 1106.4658 | 1182.1481 |
| 1197.0416 | 1254.1702 | 1323.3142 |
| 1398.5063 | 1455.3687 | 1492.6284 |
| 1504.2172 | 1732.2778 | 2901.6060 |
| 3065.0887 | 3144.4374 | 3154.2980 |
| 3158.2768 | 3169.1139 | 3245.1816 |

**TS-OaddC1**

COORDINATES

|   |           |           |           |
|---|-----------|-----------|-----------|
| C | -0.816875 | 1.107790  | 0.747792  |
| H | -1.489799 | 1.952077  | 0.792544  |
| H | -0.836554 | 0.440404  | 1.597790  |
| C | 0.264382  | 1.137922  | -0.089011 |
| C | 1.310176  | 0.101333  | -0.111513 |
| O | 2.112490  | 0.082870  | -1.022015 |
| H | 0.341868  | 1.884253  | -0.869176 |
| C | 1.357459  | -0.917506 | 1.002375  |
| H | 0.433925  | -1.496620 | 1.025968  |
| H | 2.202561  | -1.578314 | 0.837222  |
| H | 1.461151  | -0.421462 | 1.968129  |
| O | -2.094586 | 0.099057  | -0.275781 |
| O | -1.698017 | -1.192458 | -0.373788 |
| H | -1.363095 | -1.273320 | -1.277673 |

FREQUENCY

|           |           |           |
|-----------|-----------|-----------|
| -685.9198 | 51.0932   | 97.6687   |
| 114.6944  | 198.0037  | 263.0674  |
| 291.6925  | 350.8171  | 479.8139  |
| 489.5136  | 542.7904  | 549.4838  |
| 784.4863  | 796.7975  | 934.7032  |
| 965.8284  | 1015.8795 | 1049.2013 |
| 1070.8218 | 1119.4936 | 1272.4540 |
| 1289.2814 | 1396.4154 | 1421.5335 |
| 1436.8530 | 1479.3922 | 1485.3445 |

|           |           |           |
|-----------|-----------|-----------|
| 1560.6767 | 1762.6410 | 3059.2312 |
| 3129.2112 | 3165.0976 | 3166.9710 |
| 3201.8096 | 3256.1374 | 3779.0673 |

**TS-OaddC2**

COORDINATES

|   |           |           |           |
|---|-----------|-----------|-----------|
| C | -0.529685 | 1.970865  | 0.056312  |
| H | -1.235369 | 2.698827  | -0.314241 |
| H | -0.100267 | 2.144349  | 1.032123  |
| C | -0.292617 | 0.801243  | -0.637229 |
| C | 0.886723  | -0.074788 | -0.321409 |
| O | 1.175052  | -0.963821 | -1.084167 |
| H | -0.606219 | 0.730382  | -1.670028 |
| C | 1.632011  | 0.156158  | 0.963369  |
| H | 0.934284  | 0.106576  | 1.800343  |
| H | 2.397395  | -0.605607 | 1.072933  |
| H | 2.090636  | 1.145413  | 0.964599  |
| O | -1.635046 | -0.335071 | -0.041209 |
| O | -1.147324 | -1.369535 | 0.711785  |
| H | -0.800503 | -1.993390 | 0.056755  |

FREQUENCY

|           |           |           |
|-----------|-----------|-----------|
| -724.8947 | 62.2031   | 95.7347   |
| 169.9736  | 182.5187  | 262.8579  |
| 308.7540  | 348.3635  | 469.5541  |
| 496.7683  | 515.0081  | 539.7937  |
| 618.2045  | 779.7178  | 872.6813  |
| 950.7194  | 978.6051  | 1040.7310 |
| 1075.4718 | 1110.6820 | 1261.2418 |
| 1272.2530 | 1391.5436 | 1420.2111 |
| 1435.5284 | 1472.2813 | 1483.6140 |
| 1542.6827 | 1827.9963 | 3054.0352 |
| 3120.8764 | 3181.0238 | 3183.4005 |
| 3191.7330 | 3281.9885 | 3768.6286 |

**TS-OaddC3**

COORDINATES

|   |           |           |           |
|---|-----------|-----------|-----------|
| C | 2.074996  | -1.070759 | -0.147241 |
| H | 2.573437  | -2.020815 | -0.014434 |
| H | 2.607392  | -0.311225 | -0.704166 |
| C | 0.872525  | -0.856878 | 0.360989  |
| C | 0.142532  | 0.444837  | 0.269619  |
| O | -0.540168 | 0.780928  | 1.305957  |
| H | 0.355739  | -1.615331 | 0.934218  |
| C | 0.749138  | 1.547627  | -0.563195 |
| H | 1.631252  | 1.927917  | -0.048996 |
| H | 1.033450  | 1.194726  | -1.551606 |
| H | 0.023888  | 2.352434  | -0.651768 |

|   |           |           |           |
|---|-----------|-----------|-----------|
| O | -1.810030 | -1.051856 | -0.331897 |
| H | -2.619343 | -0.779308 | 0.121208  |
| O | -1.229922 | 0.128758  | -0.674746 |

FREQUENCY

|           |           |           |
|-----------|-----------|-----------|
| -726.7651 | 90.3276   | 153.9408  |
| 208.5247  | 226.3792  | 289.9667  |
| 319.7522  | 366.8652  | 424.6073  |
| 458.7298  | 486.4887  | 563.1093  |
| 700.9361  | 775.7041  | 945.1744  |
| 988.3243  | 1003.7075 | 1039.3241 |
| 1062.8502 | 1094.4443 | 1293.1169 |
| 1309.0272 | 1386.5447 | 1419.3450 |
| 1447.5219 | 1454.8138 | 1484.6551 |
| 1498.4214 | 1732.6817 | 3066.3304 |
| 3144.1464 | 3164.3116 | 3166.2246 |
| 3198.3141 | 3249.2996 | 3786.7177 |

**P-OaddC1**

COORDINATES

|   |           |           |           |
|---|-----------|-----------|-----------|
| C | 1.025563  | -0.478180 | 0.881254  |
| H | 1.387385  | -1.250397 | 1.563227  |
| H | 0.853423  | 0.438937  | 1.445470  |
| C | -0.190663 | -0.934283 | 0.156135  |
| C | -1.389404 | -0.150995 | -0.054990 |
| O | -2.304468 | -0.622473 | -0.714628 |
| H | -0.173535 | -1.907731 | -0.318568 |
| C | -1.480952 | 1.236128  | 0.537578  |
| H | -0.638170 | 1.847086  | 0.213106  |
| H | -2.414841 | 1.690187  | 0.221526  |
| H | -1.453898 | 1.189208  | 1.627350  |
| O | 2.120670  | -0.283887 | -0.004580 |
| O | 1.805780  | 0.845193  | -0.805510 |
| H | 1.676515  | 0.446021  | -1.674227 |

FREQUENCY

|           |           |           |
|-----------|-----------|-----------|
| 58.6082   | 75.0046   | 159.2120  |
| 185.8749  | 252.7379  | 271.6452  |
| 359.6339  | 474.7472  | 486.4539  |
| 500.1104  | 558.6436  | 724.2872  |
| 816.3983  | 921.7297  | 973.4638  |
| 1028.2484 | 1042.2952 | 1084.1922 |
| 1145.1505 | 1268.9358 | 1288.4713 |
| 1355.5089 | 1394.6419 | 1415.9917 |
| 1425.1822 | 1474.5477 | 1483.0625 |
| 1494.3897 | 1669.6766 | 3055.5568 |
| 3071.1819 | 3121.5902 | 3124.1139 |

3168.0884                      3188.6441                      3845.7845  
**P-OaddC2**

COORDINATES

|   |           |           |           |
|---|-----------|-----------|-----------|
| C | 0.283527  | 1.749891  | -0.421531 |
| H | -0.346785 | 2.613792  | -0.288247 |
| H | 0.942600  | 1.683674  | -1.271475 |
| C | 0.203921  | 0.598305  | 0.515511  |
| C | -0.880248 | -0.409117 | 0.084642  |
| O | -0.604103 | -1.561083 | -0.125842 |
| H | -0.076551 | 0.941796  | 1.517837  |
| C | -2.275023 | 0.133056  | -0.077142 |
| H | -2.349617 | 0.606748  | -1.057800 |
| H | -2.992062 | -0.680658 | -0.021066 |
| H | -2.495386 | 0.893345  | 0.671543  |
| O | 1.436228  | -0.053128 | 0.715624  |
| O | 1.904054  | -0.525804 | -0.535158 |
| H | 1.435310  | -1.371382 | -0.596662 |

FREQUENCY

|           |           |           |
|-----------|-----------|-----------|
| 70.2344   | 123.7627  | 141.2237  |
| 211.0485  | 238.2744  | 274.4457  |
| 337.5548  | 391.5457  | 430.8200  |
| 526.2736  | 558.1759  | 583.0783  |
| 681.4447  | 777.9506  | 927.7473  |
| 975.8600  | 996.1379  | 1029.8031 |
| 1126.4346 | 1143.9264 | 1204.0435 |
| 1262.6134 | 1362.9232 | 1393.4128 |
| 1441.3057 | 1449.0300 | 1469.2047 |
| 1476.9098 | 1845.0990 | 3050.6273 |
| 3057.2649 | 3125.5288 | 3166.6045 |
| 3179.1132 | 3300.4612 | 3770.3396 |

**P-OaddC3**

COORDINATES

|   |           |           |           |
|---|-----------|-----------|-----------|
| C | 2.102220  | -0.932377 | -0.031559 |
| H | 2.759303  | -1.640760 | -0.515956 |
| H | 2.447284  | -0.468312 | 0.882789  |
| C | 0.917772  | -0.650463 | -0.541802 |
| C | -0.038408 | 0.378922  | 0.053570  |
| O | 0.033663  | 0.269561  | 1.398809  |
| H | 0.537393  | -1.121792 | -1.439324 |
| C | 0.293262  | 1.809025  | -0.378891 |
| H | 1.300748  | 2.049313  | -0.052818 |
| H | 0.231085  | 1.869894  | -1.463104 |
| H | -0.421231 | 2.499539  | 0.064374  |
| O | -1.743019 | -1.151441 | -0.082902 |
| H | -1.991756 | -1.051297 | 0.845316  |

O -1.354633 0.160977 -0.432055

FREQUENCY

|           |           |           |
|-----------|-----------|-----------|
| 63.4599   | 168.0969  | 219.7045  |
| 240.9843  | 254.6362  | 287.9411  |
| 329.4685  | 366.8871  | 475.0503  |
| 501.0988  | 612.8639  | 691.3630  |
| 790.4529  | 920.5355  | 938.0024  |
| 999.7296  | 1006.7289 | 1023.1024 |
| 1060.5859 | 1136.2560 | 1175.8223 |
| 1200.2165 | 1317.5195 | 1386.4419 |
| 1431.5785 | 1437.3532 | 1478.7808 |
| 1492.8780 | 1716.6686 | 3075.6105 |
| 3153.8463 | 3163.9296 | 3175.5493 |
| 3190.4988 | 3244.5919 | 3807.6483 |

**TS-absH-CH<sub>3</sub>**

COORDINATES

|   |           |           |           |
|---|-----------|-----------|-----------|
| C | 0.357564  | 1.897116  | 0.128450  |
| H | 0.436603  | 2.962022  | -0.042343 |
| H | -0.602350 | 1.528617  | 0.469242  |
| C | 1.386834  | 1.091643  | -0.098099 |
| C | 1.338813  | -0.382558 | 0.067859  |
| O | 2.244975  | -1.078893 | -0.336800 |
| H | 2.333077  | 1.465426  | -0.468792 |
| C | 0.159560  | -0.999552 | 0.727637  |
| H | -0.251531 | -0.477900 | 1.587328  |
| H | -0.845902 | -0.805916 | -0.122622 |
| H | 0.235974  | -2.075898 | 0.829259  |
| O | -1.825122 | -0.565242 | -0.738554 |
| O | -2.612070 | 0.174036  | 0.114184  |
| H | -3.224757 | -0.475454 | 0.482202  |

FREQUENCY

|            |           |           |
|------------|-----------|-----------|
| -1942.8165 | 69.1519   | 85.7861   |
| 104.1901   | 152.8900  | 182.4976  |
| 309.1516   | 424.1877  | 448.5256  |
| 461.3834   | 554.4329  | 576.1464  |
| 637.7528   | 752.4971  | 805.0625  |
| 959.5716   | 1013.9412 | 1029.5991 |
| 1052.5464  | 1065.5937 | 1092.9602 |
| 1154.1161  | 1294.6344 | 1319.9743 |
| 1419.2044  | 1438.2771 | 1451.2444 |
| 1467.4333  | 1710.6125 | 1770.0843 |
| 3114.6102  | 3161.4847 | 3211.0415 |
| 3217.4544  | 3248.1228 | 3816.0113 |

**TS-absH-CH**



COORDINATES

|   |           |           |           |
|---|-----------|-----------|-----------|
| C | 0.890478  | 2.000877  | 0.112838  |
| H | 0.313129  | 2.917162  | 0.096259  |
| H | 1.960049  | 2.098705  | 0.290407  |
| C | 0.332534  | 0.827077  | -0.068101 |
| C | 0.898122  | -0.543908 | -0.079496 |
| O | 0.193148  | -1.511883 | -0.224956 |
| H | -1.096473 | 0.728966  | -0.312516 |
| C | 2.393841  | -0.658427 | 0.099243  |
| H | 2.691153  | -0.215891 | 1.049982  |
| H | 2.672077  | -1.707634 | 0.074667  |
| H | 2.906524  | -0.117071 | -0.695924 |
| O | -2.126514 | 0.441669  | -0.472506 |
| O | -2.388711 | -0.454119 | 0.556058  |
| H | -1.959687 | -1.263288 | 0.241449  |

FREQUENCY

|            |           |           |
|------------|-----------|-----------|
| -1335.6921 | 40.8960   | 92.5573   |
| 134.9325   | 162.2355  | 184.5716  |
| 240.1796   | 253.9531  | 389.6625  |
| 459.2808   | 511.2798  | 538.0362  |
| 653.5615   | 672.4241  | 775.4943  |
| 890.6279   | 957.1894  | 987.7374  |
| 1048.7324  | 1077.3531 | 1145.0384 |
| 1281.0629  | 1386.3357 | 1417.7528 |
| 1443.5890  | 1473.6025 | 1473.9900 |
| 1479.1395  | 1728.3099 | 1799.2247 |
| 3064.3531  | 3101.4310 | 3137.2330 |
| 3177.5035  | 3206.9931 | 3756.7226 |

**TS-absH-CH<sub>2</sub>**

COORDINATES

|   |           |           |           |
|---|-----------|-----------|-----------|
| C | 0.245695  | 1.566142  | 0.083211  |
| H | 0.688132  | 2.553196  | 0.041930  |
| H | 1.286621  | 0.658558  | 0.379092  |
| C | -0.998311 | 1.191738  | -0.089679 |
| C | -1.548054 | -0.202660 | -0.013366 |
| O | -2.725124 | -0.367508 | -0.212515 |
| H | -1.756834 | 1.940539  | -0.316298 |
| C | -0.610668 | -1.332450 | 0.304383  |
| H | -0.116649 | -1.157607 | 1.260332  |
| H | -1.173669 | -2.259856 | 0.336078  |
| H | 0.174377  | -1.392800 | -0.450280 |
| O | 2.208497  | 0.065155  | 0.573923  |
| O | 2.426474  | -0.643331 | -0.598628 |
| H | 3.087273  | -0.113183 | -1.060381 |

FREQUENCY

|            |           |           |
|------------|-----------|-----------|
| -1679.6472 | 50.3506   | 74.3991   |
| 126.7155   | 156.9125  | 206.2615  |
| 241.0084   | 295.5848  | 422.0881  |
| 498.0735   | 511.2886  | 514.0930  |
| 587.3059   | 714.9527  | 776.7546  |
| 905.3761   | 949.7713  | 1018.2824 |
| 1057.0197  | 1079.4003 | 1099.0519 |
| 1259.7196  | 1294.8409 | 1397.0817 |
| 1403.2841  | 1432.2141 | 1471.2609 |
| 1481.4898  | 1677.2521 | 1827.5357 |
| 3064.5905  | 3105.6869 | 3131.0992 |
| 3176.9418  | 3190.7542 | 3814.1949 |

**TS-absCH<sub>3</sub>**

COORDINATES

|   |           |           |           |
|---|-----------|-----------|-----------|
| C | -1.934310 | -1.670919 | -0.095873 |
| H | -2.695842 | -2.430643 | -0.204967 |
| H | -0.914682 | -2.008723 | 0.030341  |
| C | -2.250847 | -0.384291 | -0.121262 |
| C | -1.249969 | 0.698070  | 0.018383  |
| O | -1.473559 | 1.855104  | -0.018108 |
| H | -3.272109 | -0.041858 | -0.249812 |
| C | 0.609981  | 0.123289  | 0.278453  |
| H | 0.570964  | -0.372108 | -0.680772 |
| H | 0.881932  | 1.164704  | 0.331284  |
| H | 0.313116  | -0.397442 | 1.178968  |
| O | 2.285727  | -0.453720 | 0.530036  |
| O | 3.018475  | -0.061388 | -0.583950 |
| H | 3.422349  | 0.769207  | -0.307072 |

FREQUENCY

|            |           |           |
|------------|-----------|-----------|
| -1068.1509 | 53.0153   | 104.7061  |
| 122.0781   | 128.0477  | 208.7885  |
| 264.9800   | 326.8926  | 362.4026  |
| 409.8210   | 431.8350  | 489.3844  |
| 564.5728   | 706.5116  | 898.6635  |
| 999.5898   | 1026.6051 | 1051.6210 |
| 1112.7274  | 1143.5084 | 1186.0407 |
| 1212.5218  | 1297.9779 | 1366.9707 |
| 1388.5954  | 1403.5713 | 1448.9181 |
| 1711.0939  | 1928.9237 | 3066.8059 |
| 3160.3353  | 3172.2199 | 3240.9142 |
| 3259.7540  | 3268.9410 | 3819.9647 |

**P-absH-CH<sub>3</sub>**

COORDINATES

|   |          |          |           |
|---|----------|----------|-----------|
| C | 1.928826 | 0.144027 | -0.042195 |
|---|----------|----------|-----------|

|   |           |           |           |
|---|-----------|-----------|-----------|
| H | 2.913426  | -0.301579 | -0.013880 |
| H | 1.888523  | 1.218272  | -0.163448 |
| C | 0.837835  | -0.602639 | 0.056267  |
| C | -0.565857 | -0.106116 | 0.006517  |
| O | -1.485541 | -0.917016 | -0.043004 |
| H | 0.906761  | -1.678810 | 0.159162  |
| C | -0.845451 | 1.303923  | 0.025204  |
| H | -0.077502 | 2.054835  | 0.118495  |
| H | -1.878999 | 1.608242  | -0.031054 |

FREQUENCY

|           |           |           |
|-----------|-----------|-----------|
| 54.1175   | 308.4067  | 379.9862  |
| 436.5840  | 488.0505  | 538.6654  |
| 701.8931  | 808.4947  | 821.1826  |
| 990.2090  | 996.2595  | 1048.9962 |
| 1063.0644 | 1307.4750 | 1318.8529 |
| 1452.3274 | 1488.3049 | 1627.6680 |
| 1724.6155 | 3153.4125 | 3187.7926 |
| 3194.6726 | 3236.9125 | 3308.7510 |

**P-absH-CH**

COORDINATES

|   |           |           |           |
|---|-----------|-----------|-----------|
| C | -2.176024 | -0.163711 | 0.000001  |
| H | -2.739150 | -0.228204 | 0.926904  |
| H | -2.739163 | -0.228193 | -0.926894 |
| C | -0.896423 | -0.002400 | -0.000005 |
| C | 0.497446  | 0.187613  | 0.000003  |
| O | 0.976674  | 1.320290  | 0.000000  |
| C | 1.378693  | -1.041693 | 0.000002  |
| H | 0.803821  | -1.964203 | 0.000104  |
| H | 2.019388  | -1.010342 | -0.880222 |
| H | 2.019552  | -1.010228 | 0.880100  |

FREQUENCY

|           |           |           |
|-----------|-----------|-----------|
| 87.4297   | 158.5448  | 180.6255  |
| 333.3184  | 433.6729  | 549.6880  |
| 627.0857  | 746.5609  | 912.2424  |
| 923.2846  | 1006.9110 | 1031.9339 |
| 1200.6364 | 1396.6531 | 1416.1883 |
| 1482.2383 | 1483.0718 | 1575.4752 |
| 1897.4987 | 3072.7559 | 3093.8559 |
| 3147.5450 | 3164.7616 | 3166.2884 |

**P-absH-CH<sub>2</sub>**

COORDINATES

|   |          |           |           |
|---|----------|-----------|-----------|
| C | 1.929104 | 0.258154  | -0.000025 |
| H | 3.005885 | 0.231824  | 0.000012  |
| C | 0.939372 | -0.593384 | 0.000016  |

|   |           |           |           |
|---|-----------|-----------|-----------|
| C | -0.500176 | -0.182379 | -0.000004 |
| O | -1.363221 | -1.023040 | -0.000014 |
| H | 1.102527  | -1.670088 | 0.000067  |
| C | -0.803285 | 1.293539  | -0.000005 |
| H | -0.356736 | 1.762241  | -0.877284 |
| H | -1.878329 | 1.442844  | -0.000511 |
| H | -0.357675 | 1.761918  | 0.877935  |

FREQUENCY

|           |           |           |
|-----------|-----------|-----------|
| 95.5791   | 142.7649  | 271.8151  |
| 484.9639  | 494.3983  | 541.1128  |
| 717.9521  | 740.8464  | 856.4942  |
| 902.7878  | 1024.7819 | 1052.4179 |
| 1225.5547 | 1261.3786 | 1397.7189 |
| 1466.3534 | 1479.6553 | 1668.1896 |
| 1825.1307 | 3058.5119 | 3108.3833 |
| 3124.1245 | 3173.9755 | 3254.9608 |

**P-absCH<sub>3</sub>-a (CH<sub>2</sub>CHCO)**

COORDINATES

|   |           |           |           |
|---|-----------|-----------|-----------|
| C | -1.727559 | -0.191672 | 0.000307  |
| H | -2.658932 | 0.357000  | 0.000569  |
| H | -1.773160 | -1.272850 | 0.000263  |
| C | -0.555340 | 0.427096  | -0.000101 |
| C | 0.693712  | -0.365062 | -0.000345 |
| O | 1.802843  | 0.023226  | 0.000028  |
| H | -0.455527 | 1.507868  | -0.000225 |

FREQUENCY

|           |           |           |
|-----------|-----------|-----------|
| 132.9110  | 315.9831  | 545.9871  |
| 655.2192  | 885.2994  | 1012.7288 |
| 1042.7954 | 1103.6197 | 1288.1932 |
| 1427.2682 | 1694.6706 | 1973.5917 |
| 3151.1906 | 3165.0838 | 3252.9013 |

**P-absCH<sub>3</sub>-b (CH<sub>3</sub>OOH)**

COORDINATES

|   |           |           |           |
|---|-----------|-----------|-----------|
| C | 1.117685  | -0.220576 | 0.021122  |
| H | 1.158938  | -0.863385 | -0.858583 |
| H | 1.135664  | -0.829389 | 0.927242  |
| H | 1.961384  | 0.467361  | 0.018315  |
| O | -0.026433 | 0.600115  | -0.017860 |
| O | -1.146850 | -0.267176 | -0.102258 |
| H | -1.575837 | -0.114648 | 0.747243  |

FREQUENCY

|          |           |           |
|----------|-----------|-----------|
| 193.2089 | 267.9171  | 470.5737  |
| 958.5377 | 1119.5532 | 1187.0328 |

|           |           |           |
|-----------|-----------|-----------|
| 1228.9918 | 1412.8058 | 1462.7166 |
| 1479.3538 | 1518.6636 | 3051.7294 |
| 3127.4635 | 3147.3697 | 3845.4228 |

**Table S1.** Topological and Energy Parameters at the Bond Critical Points of the Reactant Complexes in MACR + HO<sub>2</sub> Reaction (All Values in a.u.)

| species | interactions | $\rho$ | $\nabla^2\rho_b$ | $H_b$   | $-G_b/V_b$ |
|---------|--------------|--------|------------------|---------|------------|
| Com1    | H8-O4        | 0.0397 | 0.1064           | -0.0061 | 0.8426     |
|         | O9-H6'       | 0.0104 | 0.0348           | 0.0010  | 1.1492     |
| Com2    | H8-O4        | 0.0361 | 0.1124           | -0.0029 | 0.9145     |
|         | O9-H6        | 0.0083 | 0.0292           | 0.0009  | 1.1636     |
| Com3    | H8-C1        | 0.0191 | 0.0480           | 0.0004  | 1.0360     |
|         | O9-C2        | 0.0118 | 0.0388           | 0.0011  | 1.1447     |
| Com4    | O9-C1        | 0.0091 | 0.0312           | 0.0010  | 1.1695     |
|         | H8-C2        | 0.0168 | 0.0448           | 0.0009  | 1.0957     |

According to the quantum theory of “Atoms in Molecules” (QTAIM),<sup>1-3</sup> the topological analysis based on the electron density function can provide much useful information to analyze the chemical bond, especially for the weak interactions. For the four reactant complexes, we focus on the BCPs of the interactions between the two reactant monomers. Table S1 gives the topological parameters (the electron density  $\rho_b$  and the Laplacian of electron density  $\nabla^2\rho_b$ ) and energy parameters (the electron energy density  $H_b$ ) and the ratio of the kinetic electron energy density  $G_b$  and the potential electron energy density  $V_b$  ( $-G_b/V_b$ ) at the BCPs in the reactant complexes. The larger value of the electron density  $\rho_b$ , the stronger the atomic interaction; the negative Laplacian of electron density  $\nabla^2\rho_b$  indicates the atomic interaction is a covalent bond; If  $\nabla^2\rho_b$  is positive but  $H_b$  is negative, the interaction is partly covalent in nature.<sup>4,5</sup> Generally, if the values of  $-G_b/V_b$  are greater than 1, the interaction is noncovalent; if it is between 0.5 and 1, the interaction is partly covalent in nature; and if it is less than 0.5, the interaction is a shared covalent. In the four complexes, the  $\rho_b$  value of H8-O4 bond is rather larger than the other weak bonds,  $\nabla^2\rho_b$  is positive and  $H_b$  is negative and the value of  $-G_b/V_b$  is between 0.5 and 1, indicating that the interaction is partly covalent. For the other weak interactions listed in Table S1, the  $\nabla^2\rho_b$  and  $H_b$  are all positive,

and  $-G_b/V_b$  is larger than 1, indicating these interactions are noncovalent. That is to say, the H8-O4 bond is stronger than the other weak bonds. These results are consistent with the above discussion about the atomic distances of the weak interactions between the two reactant monomers, i.e., the distance of H8-O4 (1.74 Å in Com1 and 1.76 Å in Com2) are shorter than all the other interaction distances (2.23~3.04 Å).

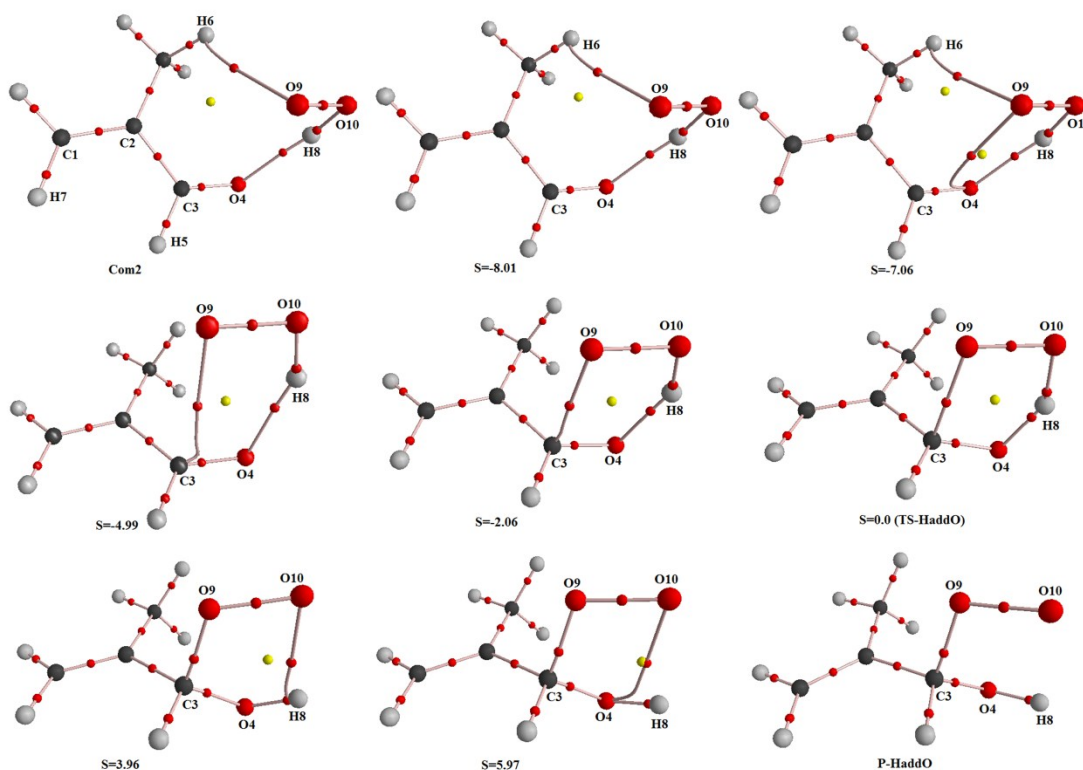

**Figure S1.** Molecular graphs of the MACR + HO<sub>2</sub> → TSHaddO → PHaddO reaction process.

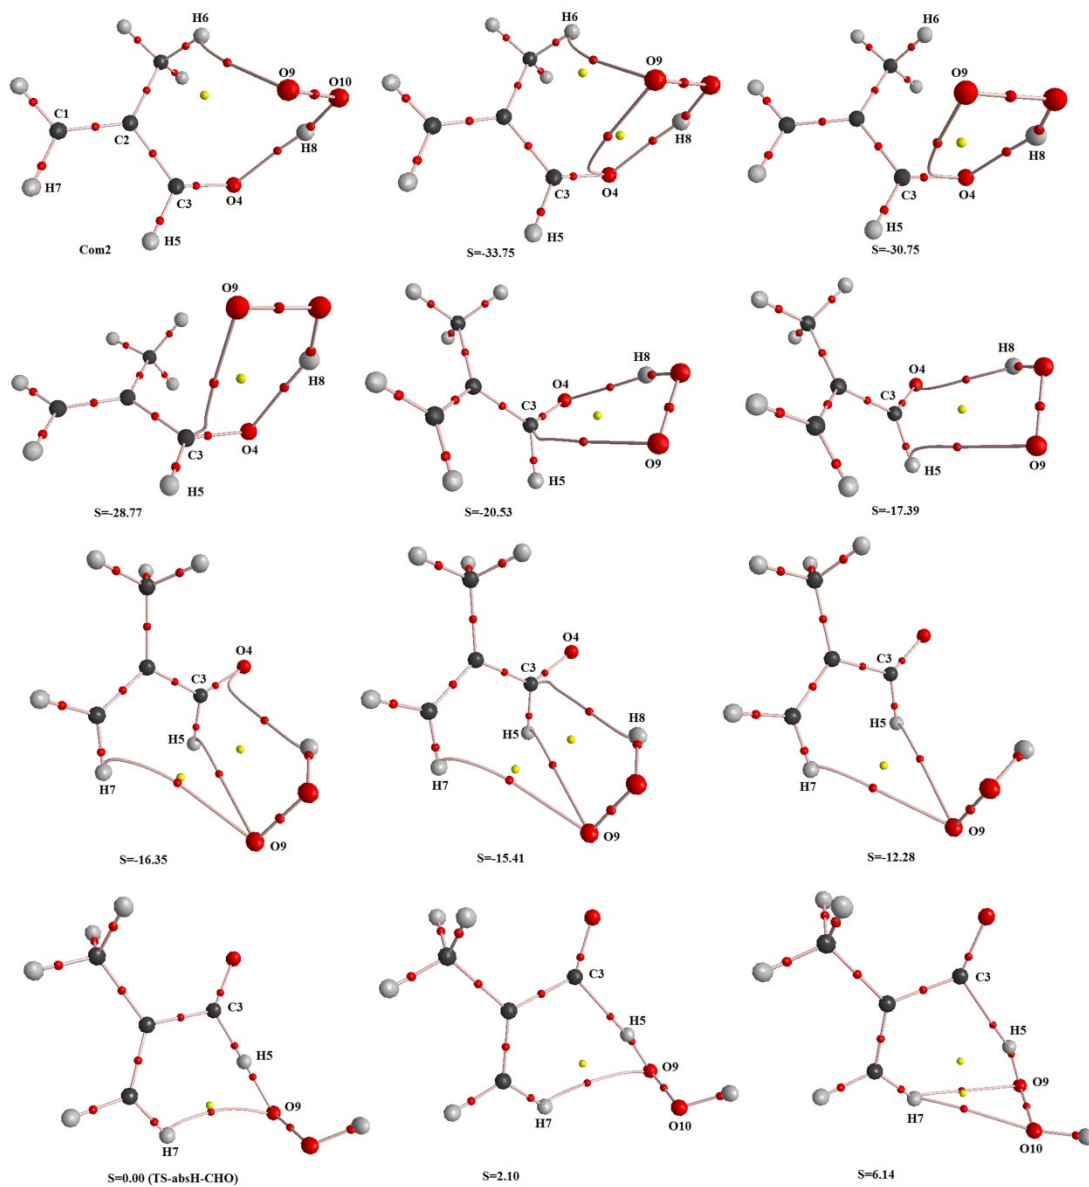

**Figure S2.** Molecular graphs of the  $\text{MACR} + \text{HO}_2 \rightarrow \text{TSabsH-CHO} \rightarrow \text{PabsH-CHO}$  reaction process.

**Table S2.** Topological and Energy Parameters at the Bond Critical Points in the MACR + HO<sub>2</sub> → TSHaddO → PHaddO Reaction Process (All Values in a.u.)

|                  | <i>S</i> | H8-O4   | H8-O10  | O10-O4 | O9-H6  | O9-O4   | O9-C3   |
|------------------|----------|---------|---------|--------|--------|---------|---------|
| <i>ρ</i>         | Com2     | 0.0361  | 0.3494  |        | 0.0083 |         |         |
|                  | -8.01    | 0.0366  | 0.3484  |        | 0.0076 |         |         |
|                  | -7.06    | 0.0356  | 0.3491  |        | 0.0067 | 0.0128  |         |
|                  | -4.99    | 0.0347  | 0.3488  |        |        |         | 0.0155  |
|                  | -2.06    | 0.0677  | 0.3199  |        |        |         | 0.0373  |
|                  | 0.00     | 0.1649  | 0.1933  |        |        |         | 0.0843  |
|                  | 2.06     | 0.3333  | 0.0585  |        |        |         | 0.1827  |
|                  | 3.96     | 0.3528  | 0.0309  |        |        |         | 0.224   |
|                  | 5.97     | 0.3622  |         | 0.0255 |        |         | 0.2299  |
|                  | PHaddO   | 0.3662  |         |        |        |         | 0.2373  |
|                  | Com2     | 0.1124  | -2.6908 |        |        | 0.0292  |         |
| -8.01            | 0.1132   | -2.678  |         |        | 0.0268 |         |         |
| -7.06            | 0.1132   | -2.6824 |         |        | 0.024  | 0.0476  |         |
| -4.99            | 0.1128   | -2.6756 |         |        |        |         | 0.0541  |
| -2.06            | 0.112    | -2.3528 |         |        |        |         | 0.1164  |
| 0.00             | -0.2464  | -0.5724 |         |        |        |         | 0.1132  |
| $\nabla^2\rho_b$ |          | -2.4352 | 0.1396  |        |        |         | -0.238  |
|                  | 3.96     | -2.6336 | 0.1328  |        |        |         | -0.4884 |
|                  | 5.97     | -2.7156 |         | 0.126  |        |         | -0.5244 |
|                  | PHaddO   | -2.7216 |         |        |        |         | -0.5656 |
|                  | Com2     | -0.0028 | -0.734  |        |        | 0.0009  |         |
|                  | -8.01    | -0.003  | -0.7309 |        |        | 0.0009  |         |
|                  | -7.06    | -0.0024 | -0.7321 |        |        | 0.0008  | 0.0012  |
|                  | -4.99    | -0.0018 | -0.7302 |        |        |         | 0.001   |
|                  | -2.06    | -0.0239 | -0.6548 |        |        |         | -0.0006 |
|                  | 0.00     | -0.1539 | -0.2311 |        |        |         | -0.0227 |
|                  | 2.06     | -0.6849 | -0.0138 |        |        |         | -0.1512 |
| 3.96             | -0.7306  | 0.0026  |         |        |        | -0.2535 |         |
| 5.97             | -0.7524  |         | 0.0036  |        |        | -0.271  |         |
| PHaddO           | -0.755   |         |         |        |        | -0.2951 |         |
| Com2             | 0.9172   | 0.0772  |         |        | 1.1636 |         |         |
| -8.01            | 0.9128   | 0.0775  |         |        | 1.1800 |         |         |
| -7.06            | 0.9275   | 0.0774  |         |        | 1.1818 | 1.1250  |         |
| -4.99            | 0.9434   | 0.0776  |         |        |        | 1.0877  |         |
| -2.06            | 0.6847   | 0.0922  |         |        |        | 0.9802  |         |
| 0.00             | 0.3749   | 0.2758  |         |        |        | 0.6924  |         |
| 2.06             | 0.1000   | 0.7788  |         |        |        | 0.3775  |         |
| 3.96             | 0.0899   | 1.0932  |         |        |        | 0.3414  |         |
| 5.97             | 0.0889   |         | 1.1481  |        |        | 0.3403  |         |
| PHaddO           | 0.0899   |         |         |        |        | 0.3423  |         |
| $-G_b/V_b$       |          |         |         |        |        |         |         |
|                  |          |         |         |        |        |         |         |
|                  |          |         |         |        |        |         |         |
|                  |          |         |         |        |        |         |         |
|                  |          |         |         |        |        |         |         |
|                  |          |         |         |        |        |         |         |
|                  |          |         |         |        |        |         |         |
|                  |          |         |         |        |        |         |         |
|                  |          |         |         |        |        |         |         |
|                  |          |         |         |        |        |         |         |
|                  |          |         |         |        |        |         |         |



**Table S3a.** Topological Parameters at the Bond Critical Points in the MACR + HO<sub>2</sub> → TSabsH-CHO → PabsH-CHO Reaction Process (All Values in a.u.)

|          | <i>S</i> | H5-C3   | H8-O4  | H8-C3  | O9-H6  | O9-O4  | O9-C3  | O9-H5   | O9-H7  | O10-H7 |  |
|----------|----------|---------|--------|--------|--------|--------|--------|---------|--------|--------|--|
| <i>ρ</i> | Com2     | 0.2881  | 0.0361 |        | 0.0083 |        |        |         |        |        |  |
|          | -35.75   | 0.2875  | 0.0351 |        | 0.0066 | 0.0132 |        |         |        |        |  |
|          | -30.75   | 0.2885  | 0.0346 |        |        | 0.0146 |        |         |        |        |  |
|          | -28.77   | 0.2891  | 0.0345 |        |        |        | 0.0155 |         |        |        |  |
|          | -20.53   | 0.2896  | 0.0177 |        |        |        | 0.0113 |         |        |        |  |
|          | -17.39   | 0.2883  | 0.0097 |        |        |        |        | 0.0092  |        |        |  |
|          | -16.35   | 0.2875  | 0.0084 |        |        |        |        | 0.0088  | 0.0046 |        |  |
|          | -15.41   | 0.2863  |        | 0.0076 |        |        |        | 0.0087  | 0.0047 |        |  |
|          | -12.28   | 0.2848  |        |        |        |        |        | 0.0085  | 0.0056 |        |  |
|          | 0.00     | 0.1821  |        |        |        |        |        | 0.1494  | 0.011  |        |  |
|          | 2.10     | 0.0451  |        |        |        |        |        | 0.3512  | 0.0094 |        |  |
|          | 6.14     | 0.0202  |        |        |        |        |        | 0.3625  | 0.0083 | 0.0089 |  |
|          | Com2     | -1.1192 | 0.1124 |        |        | 0.0292 |        |         |        |        |  |
|          | -35.75   | -1.114  | 0.1132 |        |        | 0.0260 |        |         |        |        |  |
| -30.75   | -1.12    | 0.1140  |        |        | 0.0236 | 0.0484 |        |         |        |        |  |
| -28.77   | -1.1244  | 0.1124  |        |        |        | 0.0516 | 0.0544 |         |        |        |  |
| -20.53   | -1.1284  | 0.0656  |        |        |        |        | 0.0428 |         |        |        |  |
| -17.39   | -1.1172  | 0.0336  |        |        |        |        |        | 0.0296  |        |        |  |
| -16.35   | -1.15    | 0.0300  |        |        |        |        |        | 0.0280  | 0.0168 |        |  |
| -15.41   | -1.1456  |         | 0.0280 |        |        |        |        | 0.0272  | 0.0164 |        |  |
| -12.28   | -1.089   |         |        |        |        |        |        | 0.0276  | 0.0188 |        |  |
| 0.00     | -0.448   |         |        |        |        |        |        | -0.0624 | 0.0404 |        |  |
| 2.10     | 0.0472   |         |        |        |        |        |        | -2.5756 | 0.034  |        |  |
| 6.14     | 0.0452   |         |        |        |        |        |        | -2.7300 | 0.034  | 0.0364 |  |

**Table S3b.** Energy Parameters at the Bond Critical Points in the MACR + HO<sub>2</sub> → TSabsH-CHO → PabsH-CHO Reaction Process (All Values in a.u.)

|                      | <i>S</i> | H5-C3   | H8-O4   | H8-C3  | O9-H6  | O9-O4  | O9-C3  | O9-H5   | O9-H7  | O10-H7 |  |
|----------------------|----------|---------|---------|--------|--------|--------|--------|---------|--------|--------|--|
| <i>H<sub>b</sub></i> | Com2     | -0.3093 | -0.0029 |        | 0.0009 |        |        |         |        |        |  |
|                      | -35.75   | -0.3079 | -0.0021 |        | 0.0007 | 0.0012 |        |         |        |        |  |
|                      | -30.75   | -0.3099 | -0.0016 |        |        | 0.0011 |        |         |        |        |  |
|                      | -28.77   | -0.3109 | -0.0017 |        |        |        | 0.0012 |         |        |        |  |
|                      | -20.53   | -0.3118 | 0.0017  |        |        |        | 0.0012 |         |        |        |  |
|                      | -17.39   | -0.3094 | 0.0012  |        |        |        |        | 0.0007  |        |        |  |
|                      | -16.35   | -0.3078 | 0.0012  |        |        |        |        | 0.0007  | 0.0007 |        |  |
|                      | -15.41   | -0.3056 |         | 0.0012 |        |        |        | 0.0007  | 0.0006 |        |  |
|                      | -12.28   | -0.3027 |         |        |        |        |        | 0.0007  | 0.0007 |        |  |
|                      | 0.00     | -0.145  |         |        |        |        |        | -0.1013 | 0.0012 |        |  |
|                      | 2.10     | -0.0125 |         |        |        |        |        | -0.7224 | 0.0011 |        |  |
|                      | 6.14     | -0.0004 |         |        |        |        |        | -0.7536 | 0.0012 | 0.0014 |  |
|                      | Com2     | 0.0871  | 0.9145  |        |        | 1.1636 |        |         |        |        |  |
|                      | -35.75   | 0.0869  | 0.9354  |        |        | 1.1591 | 1.1224 |         |        |        |  |
| -30.75               | 0.0877   | 0.9497  |         |        |        | 1.1028 |        |         |        |        |  |
| -28.77               | 0.0872   | 0.9460  |         |        |        |        | 1.1062 |         |        |        |  |
| -20.53               | 0.0867   | 1.1308  |         |        |        |        | 1.1558 |         |        |        |  |
| -17.39               | 0.0884   | 1.1967  |         |        |        |        |        | 1.1186  |        |        |  |
| -16.35               | 0.0896   | 1.2353  |         |        |        |        |        | 1.1250  | 1.2593 |        |  |
| -15.41               | 0.0902   |         | 1.2609  |        |        |        |        | 1.1273  | 1.2143 |        |  |
| -12.28               | 0.0926   |         |         |        |        |        |        | 1.1296  | 1.2059 |        |  |
| 0.00                 | 0.1854   |         |         |        |        |        |        | 0.4583  | 1.1558 |        |  |
| 2.10                 | 0.6603   |         |         |        |        |        |        | 0.0981  | 1.1719 |        |  |
| 6.14                 | 0.9672   |         |         |        |        |        |        | 0.0861  | 1.1967 | 1.2188 |  |

**The topological analysis of electron density on the reaction paths.**

The molecular graphs in Figures S1 and S2 depict the forming and breaking of the chemical bonds in the MACR + HO<sub>2</sub> → TS-HaddO → P-HaddO and MACR + HO<sub>2</sub> → TS-absH-CHO → P-absH-CHO reaction processes. The topological and energy parameters at the bond critical points in the two reaction processes are listed in Tables S2, S3a and S3b. From Table S2, it can be seen that for the concerted addition of terminal O and H atoms of HO<sub>2</sub> to the C=O double bond, the values of  $\rho_b$  of the forming bonds H8-O4 and O9-C3 increase gradually, while that of the breaking bond H8-O10 decreases gradually. For the forming bond H8-O4, the interaction changes from partly covalent to covalent bond; For the forming bond O9-C3, the interaction character shows from noncovalent to partly covalent, and finally to covalent bond; While for the breaking bond H8-O10, the atomic interaction shows a reverse trends, changing from covalent bond to partly covalent,

and finally to noncovalent; From Table S3a and Table S3b we can see that for the aldehyde-H abstraction processes, the value of  $\rho_b$  of the forming bond O9-H5 increases and that of the breaking bond H5-C3 decreases gradually. Before the transition state ( $S = 0.00$ ), the interaction of H5-C3 shows covalent character while that of the O9-H5 shows noncovalent, and after the transition state, the interaction of H5-C3 shows partly covalent while that of the O9-H5 shows covalent, indicating the breakage of the H5-C3 bond and the formation of the O9-H5 bond.

**Table S4.** Topological and Energy Parameters at the Bond Critical Points of the Reactant Complexes in MVK + HO<sub>2</sub> Reaction (All Values in a.u.)

| species | interactions | $\rho$ | $\nabla^2\rho_b$ | $H_b$  | $-G_b/V_b$ |
|---------|--------------|--------|------------------|--------|------------|
| Com1    | H8-O4        | 0.0464 | 0.1024           | -      | 0.7735     |
|         | O9-H5        | 0.0129 | 0.0428           | 0.0011 | 1.1294     |
| Com2    | H8-O4        | 0.0470 | 0.1048           | -      | 0.7780     |
|         | O9-H6        | 0.0084 | 0.0304           | 0.0010 | 1.1786     |
|         | O9-C1        | 0.0091 | 0.0296           | 0.0008 | 1.1404     |
| Com3    | H8-C2        | 0.0164 | 0.0436           | 0.0010 | 1.1111     |
|         | O9-H6'       | 0.0076 | 0.0248           | 0.0007 | 1.1458     |
| Com4    | H8-C1        | 0.0178 | 0.0456           | 0.0007 | 1.0700     |
|         | O9-C2        | 0.0102 | 0.0344           | 0.0011 | 1.1719     |
| Com5    | O9-H6'       | 0.0060 | 0.0216           | 0.0008 | 1.2105     |
|         | O9-H7        | 0.0093 | 0.0320           | 0.0009 | 1.1452     |
|         | O10-H6''     | 0.0062 | 0.0228           | 0.0008 | 1.1951     |

**Table S5.** The rate constants of the addition and hydrogen abstraction reaction channels for the reaction of MACR + HO<sub>2</sub> in the temperature range of 200-500 K (The rate constant data to create Figures 6).

|                | 200      | 250      | 298      | 350      | 400      | 450      | 500      |
|----------------|----------|----------|----------|----------|----------|----------|----------|
| TST-add        | 1.12E-14 | 7.69E-15 | 6.22E-15 | 5.45E-15 | 5.11E-15 | 5.00E-15 | 5.04E-15 |
| TST/Eckart-add | 5.69E-14 | 2.18E-14 | 1.34E-14 | 9.87E-15 | 8.32E-15 | 7.55E-15 | 7.20E-15 |
| TST-abs        | 4.00E-27 | 1.62E-24 | 8.47E-23 | 1.94E-21 | 1.94E-20 | 1.22E-19 | 5.51E-19 |
| TST/Eckart-abs | 4.11E-20 | 1.64E-20 | 2.34E-20 | 6.70E-20 | 2.31E-19 | 7.81E-19 | 2.40E-18 |

**Table S6.** The rate constants of the addition reaction channel for the reaction of MVK + HO<sub>2</sub> in the temperature range of 200-500 K (The rate constant data to create Figures 7).

|         | 200      | 250      | 298      | 350      | 400      | 450      | 500      |
|---------|----------|----------|----------|----------|----------|----------|----------|
| TST-add | 3.83E-14 | 1.81E-14 | 1.15E-14 | 8.46E-15 | 7.00E-15 | 6.21E-15 | 5.80E-15 |

1. R. F. W. Bader, *Atoms in Molecules: A Quantum Theory*, Oxford University Press, Oxford, 1990.
2. P. Popelier, *Atoms in Molecules: An Introduction*, UMIST, Manchester, U.K., 2000.
3. C. F. Matta and R. J. Boyd, *The Quantum Theory of Atoms in Molecules. From Solid State to DNA and Drug Design*, Wiley-VCH, Weinheim, 2007.
4. D. Cremer and E. Kraka, *Angew. Chem., Int. Ed. Engl.*, 1984, **23**, 627-628.
5. R. G. A. Bone and R. F. W. Bader, *J. Phys. Chem.*, 1996, **100**, 10892-10911.
